# Supplementary material for: Velocity-Based Strength Training: The Validity and Personal Monitoring of Barbell Velocity with the Apple Watch
Source: MDPI journal article supplement (doi:10.3390/sports11070125), 2023-06-23
Supplement: s1 [file s1]

Table S3 Velocity parameters of the barbell-mounted Enode pro device in comparison to Vicon as criterion: Calibration equation parameters with confidence limits (in bracket), Standard Error of Estimate (SEE) and Correlation Coefficient (r). Slope, Intercept a

| Enode Pro Barbell |                    |                         |                            |                |                         |
|-------------------|--------------------|-------------------------|----------------------------|----------------|-------------------------|
| Device            | Velocity zone      | Slope                   | Intercept                  | SEE (ms-1,%)   | Pearson's r             |
| V mean            | slow<br>(t>=1.25s) | 1.195<br>[1.086, 1.316] | -0.110<br>[-0.164, -0.061] | 0.078<br>18.4% | 0.660<br>[0.582, 0.726] |
|                   | fast<br>(t<1.25s)  | 0.991<br>[0.965, 1.018] | 0.013<br>[-0.008, 0.033]   | 0.036<br>4.6%  | 0.976<br>[0.969, 0.981] |
|                   | total              | 1.065<br>[1.041, 1.090] | -0.048<br>[-0.063, -0.033] | 0.059<br>9.6%  | 0.966<br>[0.959, 0.971] |
| V peak            | slow<br>(t>=1.25s) | 1.017<br>[0.930, 1.113] | 0.123<br>[0.036, 0.202]    | 0.184<br>17.6% | 0.710<br>[0.641, 0.768] |
|                   | fast<br>(t<1.25s)  | 0.846<br>[0.778, 0.920] | 0.362<br>[0.264, 0.451]    | 0.180<br>12.2% | 0.731<br>[0.668, 0.783] |
|                   | total              | 0.967<br>[0.921, 1.016] | 0.185<br>[0.131, 0.237]    | 0.188<br>14.8% | 0.833<br>[0.804, 0.858] |
| V prop            | slow<br>(t>=1.25s) | 1.001<br>[0.884, 1.134] | -0.009<br>[-0.064, 0.039]  | 0.114<br>28.2% | 0.234<br>[0.110, 0.350] |
|                   | fast<br>(t<1.25s)  | 0.756<br>[0.718, 0.796] | 0.231<br>[0.203, 0.258]    | 0.076<br>9.9%  | 0.907<br>[0.883, 0.927] |
|                   | total              | 0.990<br>[0.949, 1.032] | 0.032<br>[0.008, 0.055]    | 0.113<br>19.1% | 0.882<br>[0.860, 0.900] |
