# Supplementary material for: Velocity-Based Strength Training: The Validity and Personal Monitoring of Barbell Velocity with the Apple Watch
Source: MDPI journal article supplement (doi:10.3390/sports11070125), 2023-06-23
Supplement: s1 [file s1]

Table S2 Velocity parameters of the wrist-worn Apple Watch in comparison to Vicon as criterion: Calibration equation parameters with confidence limits (in bracket), Standard Error of Estimate (SEE) and Correlation Coefficient (r). Slope, Intercept a

| Apple Watch Wrist |                   |                         |                            |                            |                         |
|-------------------|-------------------|-------------------------|----------------------------|----------------------------|-------------------------|
| Device            | Velocity zone     | Slope                   | Intercept                  | SEE (ms <sup>-1</sup> , %) | Pearson's r             |
| V mean            | slow<br>(t≥1.25s) | 0.919<br>[0.858, 0.985] | 0.027<br>[-0.002, 0.054]   | 0.057<br>13.3%             | 0.824<br>[0.781, 0.859] |
|                   | fast<br>(t<1.25s) | 0.964<br>[0.921, 1.009] | 0.039<br>[0.004, 0.072]    | 0.063<br>8.1%              | 0.922<br>[0.902, 0.938] |
|                   | total             | 1.016<br>[0.992, 1.041] | -0.008<br>[-0.023, 0.007]  | 0.064<br>10.4%             | 0.959<br>[0.952, 0.965] |
| V peak            | slow<br>(t≥1.25s) | 1.307<br>[1.234, 1.385] | -0.136<br>[-0.209, -0.068] | 0.112<br>10.4%             | 0.879<br>[0.849, 0.904] |
|                   | fast<br>(t<1.25s) | 1.060<br>[1.005, 1.118] | 0.090<br>[0.014, 0.163]    | 0.116<br>7.9%              | 0.891<br>[0.864, 0.913] |
|                   | total             | 1.105<br>[1.072, 1.139] | 0.041<br>[0.003, 0.078]    | 0.114<br>8.8%              | 0.934<br>[0.922, 0.944] |
| V prop            | slow<br>(t≥1.25s) | 0.916<br>[0.854, 0.982] | 0.027<br>[-0.000, 0.053]   | 0.056<br>13.8%             | 0.818<br>[0.774, 0.855] |
|                   | fast<br>(t<1.25s) | 0.996<br>[0.956, 1.038] | 0.017<br>[-0.015, 0.047]   | 0.061<br>7.9%              | 0.937<br>[0.921, 0.950] |
|                   | total             | 1.029<br>[1.006, 1.052] | -0.013<br>[-0.027, -0.0]   | 0.062<br>10.4%             | 0.964<br>[0.957, 0.969] |
