# Supplementary material for: Velocity-Based Strength Training: The Validity and Personal Monitoring of Barbell Velocity with the Apple Watch
Source: Sports (Basel). 2023 Jun 23;11(7):125. doi: 10.3390/sports11070125 (PMC10383699; doi:10.3390/sports11070125)
Supplement: Supplementary file 1 [file sports-11-00125-s001.zip]

Archive with 6 entries (6 files):
- Supplementary S1.pdf
- Table S1.pdf
- Table S2.pdf
- Table S3.pdf
- Supplementary S2.pdf
- Supplementary S3.csv
