# Supplementary material for: Velocity-Based Strength Training: The Validity and Personal Monitoring of Barbell Velocity with the Apple Watch
Source: Sports (Basel). 2023 Jun 23;11(7):125. doi: 10.3390/sports11070125 (PMC10383699; doi:10.3390/sports11070125)
Supplement: Supplementary file 1 [file sports-11-00125-s001.zip › Supplementary S3.csv]

awWR_vmean	awWR_vpeak	awWR_vprop		awBB_vmean	awBB_vpeak	awBB_vprop		vicon_vmean	vicon_vpeak	vicon_vprop		vpro_vmean	vpro_vpeak	vpro_vprop
0.8645960376838150	1.4149014022686300	0.8554028573597290		0.8792034771892450	1.397063404334830	0.8606424956977050		0.9310596503232620	1.4647509070456000	0.9258898955109010
				0.9233362098198140	1.5667843261828500	0.9096450284783660		0.9468164648885510	1.6718824013704500	0.9514778945624920
				0.9324448241086340	1.6147166578835900	0.9218053299928420		0.9710362421989560	1.7526533293384500	0.9665848653738240
0.9223166252040790	1.5680842457228700	0.8986565655932370		0.952170950739292	1.6135389071932100	0.9177891461387520		0.8499785008913940	1.626168743611200	0.8246452945775400
0.9255965640948250	1.5426894553771100	0.9206513184313640		0.8529233940540260	1.4564180217111200	0.8274221265573120		0.8792303082338460	1.5988442767534300	0.8704561325361590
0.9367800364005240	1.6812317663659200	0.9109751766277360		0.8414056230220510	1.5242728286498500	0.7942873422291210		0.8987836672728430	1.728102509633000	0.8775124318787450
0.8531216133712200	1.5249589992025200	0.8136426067452950		0.7837629024224510	1.4714727079810300	0.7435395157844190		0.7537050552453430	1.6156823467890900	0.7222352368638160
0.7407270004401010	1.4588312264426900	0.7074308603244990		0.6792916739458910	1.3806998645618900	0.6393632770188650		0.7064879477969900	1.5973553804575700	0.6673830841181250
0.7096366126258460	1.3848321012264900	0.669809065092282		0.6652025991778860	1.3918290845965600	0.6264471354817540		0.6986437741412470	1.6069758672691700	0.6673506337991030
0.771450740723197	1.467639255150590	0.7384545567379140		0.7486466781356810	1.426642652217270	0.7073156044840470		0.6733337858321520	1.5214620733106800	0.637202896198413		0.681	1.354	0.501
0.5746723065815150	1.246300497460140	0.5447469081899340		0.5640977091908090	1.2656297397035400	0.5240599248003480		0.595188242511701	1.474593898033940	0.5613442984084150		0.592	1.33	0.435
0.6337558195046200	1.2649223509247100	0.58318089233145		0.5316420946514550	1.284621266799840	0.480472579062486		0.5725700226051670	1.5238026419218200	0.531015519780395		0.571	1.377	0.382
0.4417460172327830	1.1119619482046500	0.4056148597488260		0.5134289011080410	1.1974803675116500	0.4776555876127320		0.4539657990790090	1.3303275043324000	0.4203752380004430		0.472	1.345	0.335
				0.3941599813824780	1.094055101676620	0.3577214796901500		0.4438761983162000	1.3047554077073100	0.4149356657796910		0.44	1.359	0.333
				0.3650332020441030	1.1425230121006100	0.3280889595265360		0.3919948701246750	1.3786504573018600	0.3548641046808550		0.372	1.412	0.312
0.212621416387906	0.7867313274760540	0.1930746985490880		0.2097136380815580	0.7513062509734850	0.190556401535454		0.2104201429569720	0.8497295922180000	0.1940344553267990		0.358	0.77	0.333
0.2183092310045950	0.9251100141147760	0.1973160023386350		0.1589652867257500	0.8074679290964240	0.1421751828180780		0.1508794526015970	0.996082521175822	0.135999587686472
0.4712959757871870	0.8772897970730510	0.4520033924485690		0.5084987642063080	0.9183887255407970	0.4829319195201110		0.4736998255136550	0.9610396037820690	0.4524323960575760		0.461	0.82	0.345
0.5220320481008800	1.1861233068734900	0.4842384002890940		0.4467870756723180	1.0699229968442100	0.4078966440377660		0.4736586377275630	1.2955456949449900	0.4389422374729230		0.472	1.041	0.305
0.5050245036858460	1.1859580676137700	0.4718543268466870		0.5282611140502230	1.1991812801479200	0.4818169256927540		0.5349565674737980	1.416574870319230	0.5006697554689240		0.504	1.164	0.332
0.4346876742601730	1.1556251407476000	0.3904533105603880		0.535591392112663	1.2648716272148700	0.4877746235890980		0.5284203632601890	1.4183780771748800	0.4901702884990030		0.486	1.183	0.319
0.4366833270449500	1.1348635259798700	0.4024208365421520		0.4032421201292980	1.109486563288860	0.3640756996962330		0.4301067779182790	1.3142718758050900	0.3938519435989390		0.396	1.014	0.323
0.3697493263738720	1.0285869148526700	0.3378020431203570		0.4039774549037	1.0911289817791800	0.3673574409883260		0.4053571683093140	1.2716069601067100	0.3730072815725510		0.325	0.228	0.341
				0.3023407547424570	1.0349938226269000	0.2681908453377380		0.3329756158624020	1.24713500541518	0.3008940144931380		0.594	0.957	0.575
				0.3606488272323210	1.0741458026709700	0.327554838559712		0.3500354843595540	1.194277344770440	0.3196339969367880		0.551	1.008	0.535
				0.2668847134311290	0.9991704013673300	0.2410127964076580		0.2691866987190300	1.1092511049286300	0.2479517827852360		0.515	0.991	0.49
				0.2995601455890670	0.9744273120814780	0.2746223902493960		0.3182767744049190	1.0879893375303300	0.2935388021181160		0.516	0.88	0.493
0.7993492960287090	1.3032406862760100	0.7819214923538490		0.8650764908179320	1.4016058586406300	0.8361699874116390		0.8578325837221170	1.4449107798892800	0.842111743951107
0.8694432224541580	1.4736030610906000	0.8826402915277690		0.9424699013202990	1.594393498695240	0.9229382321600750		1.006251736441030	1.7904988088007700	1.003735242449870
0.9615417051534120	1.6412303477534300	0.944061094240132		0.9433423082610870	1.619810720290480	0.9163657607821430		1.006647053051250	1.866143705514720	1.0027924649280900
0.857625358146553	1.535059983597670	0.8151136837699040		0.9028224328228100	1.6201249786723600	0.8568729164813530		0.8726513184451530	1.7787696042608800	0.8457541222350890		0.848	1.549	0.851
0.8190666569851330	1.4516915210172800	0.7880922365311860		0.8354749038745520	1.4668762878122000	0.7986270347573140		0.877433109344597	1.75707892492635	0.8589997096621330		0.864	1.519	0.879
0.7574511620758840	1.3665185804972900	0.7558293315190010		0.8117152855279250	1.4017386695813700	0.7628469131105140		0.8995133058639630	1.7537111181216200	0.8782717904873020		0.883	1.518	0.898
0.6897630862906020	1.3361000323455500	0.6545594141400130		0.7422062196212080	1.4166484955413700	0.6904973129852020		0.7465869761447900	1.704887270308520	0.7030927749618640		0.717	1.448	0.709
0.6150264782776610	1.2568271065961100	0.5827158412884680		0.6820600488775170	1.3758056551871600	0.6254157082725860		0.7515191309633490	1.7784063012012900	0.7165472875751740		0.737	1.496	0.72
0.6897985172670710	1.2554545432482500	0.6659789281712430		0.7342175806601720	1.3832009890447700	0.6886688873914630		0.7878394427821830	1.726664768121260	0.7550243273690240		0.778	1.448	0.775
0.7274756497670800	1.306326492144700	0.7012318078832070		0.7851964944090890	1.4507128854842900	0.7386802227408270		0.712331933255422	1.614770600875610	0.6802378065505890		0.698	1.333	0.483
0.6786386285817840	1.228863480228760	0.6553664865500750		0.6644346529519920	1.2925390622789600	0.6216716573652050		0.7220991428452300	1.6375699918405200	0.6940605781037610		0.705	1.321	0.501
0.7542869842383540	1.3030719547007700	0.7315491681332970		0.6815083508435750	1.3286095078234400	0.6369806297999500		0.7407813277785930	1.6888388407843000	0.7124602140917660		0.742	1.385	0.513
0.5696785797107810	1.103997635177110	0.5442767009259760		0.618046046795028	1.148995765461700	0.5861659221003010		0.5366261130587600	1.2758370605158900	0.512820756535947		0.519	1.055	0.36
0.4205010267524640	1.0077861565052400	0.3786710606199760		0.4485681380522380	1.1200016277759100	0.4107829744426830		0.5134044283040910	1.5111600594508700	0.4820893764722600		0.523	1.205	0.401
0.6186593643814350	1.213707316523650	0.5894089531050010		0.5382108901451470	1.178017661748360	0.5009228749592930		0.5547329905923710	1.4955163334348300	0.5206262971045410		0.548	1.211	0.442
0.6029095037945530	1.1248204750747400	0.5734880073116570		0.6098969965280510	1.2353716026672700	0.5687008606934140		0.6004438033086620	1.503942151661680	0.5672796214323700		0.582	1.159	0.391
0.4944160720413870	1.0514690234673200	0.460982861624689		0.6013717250041910	1.2720003542558100	0.5599156638320660		0.4873272184248120	1.4105752331272000	0.4487797539893100		0.475	1.121	0.376
0.4623628146633860	1.0230433763385400	0.4306740904260680		0.4208326818428140	1.1160809542151700	0.3840046230294200		0.3856672289921780	1.3447544444802800	0.3534973792583990		0.375	1.031	0.339
0.2714054476258770	0.6648850736781400	0.262840176498735		0.2315786693395840	0.644662677573976	0.2210113710067050		0.2260697515804160	0.7775447225757490	0.2159158826112450		0.357	0.649	0.342
0.4845425596193800	1.0217569116513800	0.4538082359586970		0.4996797172051760	1.0630612499228500	0.4697401180220100		0.4707081566644190	1.2142026398212200	0.4495819333360200		0.484	1.294	0.342
0.5905530350498350	1.15792951326045	0.5507890678744540		0.5822210792517380	1.1891033139124500	0.5406029050106810		0.5409455294629240	1.3963379116860300	0.508382289597851		0.515	1.413	0.354
0.584788595326803	1.0899332136993700	0.5483320278208510		0.5143812428536380	1.0822460944151000	0.4805181090518480		0.5154097879327710	1.25731031850396	0.4888762937718850		0.505	1.336	0.368
0.5245996286460950	1.0549116052739100	0.4869605575248680		0.4561939297807820	0.9697940163045730	0.4287440551360910		0.4968715063043180	1.2753171201389900	0.4691684463916700		0.491	1.338	0.389
0.3985914842578800	0.854507374036908	0.3745468278337		0.3714939665938390	0.9128975218165920	0.3429784127623280		0.4469561254842700	1.1684142878235400	0.4243051096311370		0.428	1.257	0.345
0.4292297260727780	0.8583515743138690	0.4070515081036390		0.3891406626025170	0.8767010343288750	0.3646642782874030		0.3820234622173640	1.0383307157802400	0.3583114799227070		0.372	1.109	0.337
0.8301748483390170	1.4311600912703200	0.804458935829761		0.7865752454580210	1.3625920346037700	0.7610635125103660		0.8148926626918320	1.453057477114860	0.7914426466675930		0.86	1.167	0.867
0.792268321542378	1.3057794342158400	0.7778186595608950		0.7265564484460630	1.208562698785070	0.7146908755721950		0.8153129985699290	1.3484657902965000	0.8022229651734440		0.865	1.088	0.883
0.8575435508672160	1.4171124389297100	0.8487667769634980		0.7910284385708070	1.3250234732222700	0.7822683562721930		0.8904574333849150	1.5069563125884300	0.8823168680616430		0.941	1.229	0.968
0.9129459419497650	1.5163355049846000	0.8645400523980100		0.8137705499613070	1.3961690733142900	0.7863738135034160		0.8578154367174770	1.5422913868263300	0.8353310258359730		0.823	1.257	0.831
0.8530842012629010	1.4536857058956000	0.8309341496201370		0.8211554493218510	1.4011736253978600	0.7876175928110870		0.8946231803850230	1.6383807489484500	0.8773622043829390		0.868	1.273	0.874
0.8181079264095120	1.4922061319035300	0.7868196357604820		0.7365822099090440	1.3665282722372000	0.7106860356616600		0.8427780433313410	1.620365051417180	0.8118327525984060		0.839	1.228	0.832
0.8093479939383970	1.3835028004124200	0.7756868651551490		0.830118779899786	1.395930915080350	0.7909746558188980		0.8131827982669710	1.4739295970764900	0.7882851852719600		0.8	1.26	0.805
0.7800017980190490	1.3278523808822600	0.7640977688808220		0.7897040431157160	1.3640923220595600	0.7665575857218000		0.8299079640923320	1.5042116630344900	0.801469228105433		0.814	1.259	0.821
0.6983853497004150	1.2913861236829700	0.6676574715641220		0.7281330591268960	1.3463992601462400	0.6975998787862120		0.791347226131663	1.5677655787460700	0.7664194618357140		0.789	1.278	0.784
0.7421353372580850	1.3086877147257500	0.71355480631365		0.7057431184734470	1.2546314058492900	0.6795526141194370		0.7235466460950400	1.3687117416989200	0.7012601350772420		0.686	1.142	0.679
0.6538986328004580	1.2124145541762800	0.6154490043050110		0.6225853878096700	1.179356772899170	0.5918217581769630		0.7063870695624850	1.4438067310769600	0.6868489904429810		0.676	1.106	0.476
0.6530438640229820	1.2546355951078000	0.6207299446707680		0.6104366258198470	1.1984182100662500	0.5750924479327140		0.6864268841304160	1.4479062849297600	0.6581036732036900		0.672	1.097	0.466
0.6263538053615880	1.1841793877921200	0.6037764425413370		0.621597162569411	1.171948576237150	0.5924170332444820		0.6087527949885960	1.317117102863700	0.581670359156271		0.58	1.019	0.386
0.543474108409445	1.0897379423074200	0.5140188327673870		0.5409209615131940	1.088155154795910	0.5094646822214990		0.5807826777337610	1.3193470763119200	0.552246828333773		0.558	0.962	0.401
				0.4903795904299830	1.0800271437628800	0.4590450861536190		0.5605884339713250	1.3560355187717700	0.5297764111888660		0.552	0.975	0.423
0.5159368064170460	1.129512605214170	0.4963347277735150		0.5101286059702240	1.1103982266592500	0.4798491628580160		0.509143565430863	1.3128373897598500	0.4808557190929210		0.493	0.921	0.359
0.4669111792012460	1.089320706239450	0.4416683171076240		0.4260198417841290	1.027084950152080	0.3980762031996550		0.4354796742531220	1.2425590663676100	0.4108936688036540		0.429	1.049	0.315
0.3463225447073290	0.9743006546600800	0.3192369643601690		0.3184728601223290	0.9196215849781720	0.2948874452531730		0.3380501287235350	1.1574571531337800	0.3156221810280490		0.483	0.845	0.463
0.2994720901184490	0.9245273521405540	0.2781342332483820		0.2581959980167180	0.8585935818364270	0.2404931306924600		0.2522778403979070	1.047226816592210	0.2352644833290210		0.453	0.719	0.432
0.1887477228520550	0.7995771927588120	0.1708673520240400		0.2276729973584320	0.8189685932347880	0.2104918054642010		0.2031189952016930	0.9794129387544220	0.1872415427375390
0.5387691846421970	1.0768336498601000	0.5073796523215420		0.5097792964504930	1.0542273161746400	0.482755705641087		0.481468454714026	1.162618460225170	0.4546972949409330
0.5150198535814820	1.0609657876995300	0.4895516627571410		0.4784850929593800	1.0070999844300700	0.4555781455424640		0.504778676830494	1.17479667696075	0.483304963824013
0.4425463031004530	1.0146949927935500	0.4134812831965180		0.4315360222417310	0.9902125073685230	0.405055026828637		0.4856392761651940	1.2446039120999100	0.4615408940700280
0.4113446735366950	0.8563617094916850	0.3937654277836710		0.3988245884210060	0.846774502751741	0.3828154485445570		0.4337850130457870	1.0635206522779100	0.4167360812366750
0.3873364530929840	0.9686346080582840	0.3633635998655920		0.3959485465814290	0.9597832097536980	0.3716565753017350		0.4209407159433750	1.1918279398249300	0.3979600462683010
0.4055473571491980	0.9787948482101540	0.3782233056254980		0.3652585138554860	0.9444712411082330	0.3422904350815490		0.3975058199867830	1.1393529445466600	0.3765356326255420
0.3201753251952120	0.8933437968704260	0.2941771924918990						0.3495978810731770	1.1142631247363900	0.3253301762566950
0.4106417903784700	0.9366985607286640	0.3860953288755180						0.3722502126985090	1.0413658633998500	0.3498255502986160
								0.2978083433011290	0.94784980340537	0.2817466086463120
								0.2866162068710700	0.9932801202886590	0.2669485896665680
								0.2799330458417420	0.8236035229285330	0.2643543300455800
								0.25970388567514	0.7721090872848440	0.2466666309917140
								0.2597405102102270	0.7465245217010760	0.2468104321043770
0.9664120583995040	1.656897921938170	0.9632540981445850		1.0178335545036900	1.721099816425110	0.9742332380349110		1.0320575643855800	1.8277065805570100	1.0258535761247300		1.006	1.284	1.038
0.961862770725006	1.620496253462770	0.951377377039414		0.9458345004447090	1.60633195087516	0.9359029442256010		1.0460197790573100	1.7863110742506500	1.059472188579760		1.09	1.201	1.128
1.03781454845045	1.646317847596430	1.0747915452301600		1.0629231549259100	1.721467334853960	1.080837852279400		1.1237532226908700	1.902994038482050	1.1343587232814500		1.196	1.299	1.257
0.9442100882231510	1.5983726541689000	0.929779374243126		0.9654219133721470	1.6130256752560000	0.941599810594144		0.945444628209552	1.6174470006189300	0.9398136776178380		0.92	2.256	0.987
1.044605869721530	1.6023477104083500	1.0410283272770500		1.0200028428462900	1.652464460577950	1.01184197169645		1.0486627906087600	1.808452362252590	1.0642441080574400		0.965	2.353	1.058
1.0150878342109300	1.7166266629262900	0.9731179813707120		0.969680833079264	1.7183861918805200	0.928525116252452		1.028897801009620	1.9701384920384000	1.0237086834549200		0.953	2.46	1.02
0.9099674828888800	1.5694232767535800	0.8670190630063230		0.8686394384186490	1.5971709770035200	0.8211486988570130		0.8770923962198780	1.7941041018203100	0.8648137668006840
0.8699204042052620	1.4784998681115200	0.8462541156937570		0.871746406765697	1.553242873983870	0.8409440187307940		0.9235993444975260	1.8149380739858800	0.9117508387043420
				0.8006306114213250	1.4104940910513600	0.7888739604618630		0.9482603990904280	1.7083268440463800	0.9418831408515200
0.8195038216027510	1.3707976530573200	0.8058696621935550		0.8298277412360060	1.4226992956482900	0.8033917934031500		0.8275116145572910	1.5659472715070000	0.8235034490546670
0.7508683333298220	1.3559981827054900	0.7126655320818340		0.770640146670959	1.4406330563058700	0.7287914071928460		0.8262056933979200	1.721055993652730	0.803679304779553
0.755788222963159	1.377197548778620	0.7194156284411140		0.8102115027062300	1.5049664463724400	0.7683712445945900		0.8402263532162730	1.7409915478094700	0.8161091026653450
0.7179880925381400	1.3318682316017000	0.6883548079685890		0.7767920787929610	1.4139862510333400	0.7362555824765870		0.722700888572501	1.5909234953969000	0.7040871945557110		0.782	1.243	0.58
0.6000949801004580	1.1290144959332000	0.57281821577096		0.6662548430365740	1.245397710886570	0.6391664487639640		0.6798158239177380	1.435028273123090	0.6611873565159900		0.719	1.236	0.564
0.629746552716246	1.2368645123374000	0.5989575164289770		0.6644400485106580	1.2520729485386900	0.6318899500438290		0.6940049788617300	1.5063536911434800	0.6751314751426410		0.708	1.286	0.552
				0.6820289705929730	1.2571376722449800	0.6471683464997750		0.6772426786274970	1.477297977227700	0.6473854030935090		0.524	1.205	0.395
0.6540694638623920	1.3884527599881100	0.605573805869352		0.5707860490166310	1.272243153540760	0.5298422834195770		0.534227383296084	1.492112908564380	0.5039950723353910		0.484	1.088	0.39
0.6040088159840420	1.1591072769463400	0.5701775269623920		0.4984113917145490	1.055508870366050	0.4696437458325710		0.489670886025102	1.2522349787133900	0.4648640059627800
0.2864731559350410	0.9907458445658160	0.2601064007083680		0.2608334023746160	0.9739633697529230	0.2318992315737030		0.2677309347392860	1.2374743877892800	0.2428390518081930
1.010559805796230	1.434773808145160	1.0311226291350100		1.002958919885540	1.465097323065260	1.0229845616523600		1.0012156536228800	1.5951011841410700	1.0489007673217300
0.9680869002174780	1.4780228016282600	1.00363637546186		0.9191310459224580	1.4607758785826200	0.9340338240660940		1.026181799074320	1.6908182837385800	1.0359088759720300		0.926	2.319	0.751
0.92067653705889	1.3699414960704400	0.9597372982107070		0.8722531562169210	1.3465086370770700	0.9013554282571190		1.0531683658795900	1.6969262952349900	1.074158464274350		0.928	2.331	1.036
1.0096069046375500	1.4393749029684800	1.014441087410970		0.9544571846610410	1.4478018680301100	0.94699080255344		0.9318111132841770	1.5129064682863800	0.9462848822903250		0.937	1.308	0.779
0.9364061073576740	1.3564008565875800	0.9474765688775710		0.9883530884714240	1.5244705091548700	0.9775632209810020		0.9631725268488320	1.6126390425380800	0.973716335182068		0.962	1.371	0.778
0.9153398876936820	1.2712181195572600	0.9370803426107320		0.8651154850648740	1.3262668882234300	0.8656849512948350		0.9204977959519660	1.4897901067088700	0.9354055239108670		0.934	1.318	0.817
0.8769363796391250	1.2838145563348800	0.873252722159005		0.8687556211346950	1.2873768211634600	0.8711543974862440		0.7989892307818840	1.436892035857820	0.7970541096460600		0.805	1.092	0.691
0.8311484267543670	1.260900329252040	0.8225575001530430		0.7111518166955820	1.158435632854930	0.6947110144156650		0.7851210290632330	1.4109511751216100	0.782498432643019		0.804	1.08	0.677
0.5969522048568740	0.9721728771596790	0.6050621560666830		0.7981867535175350	1.225915264130780	0.7935973229104340		0.8067805030596830	1.420855403819590	0.8120232455184740		0.846	1.048	0.785
0.617618501058981	0.8700146399866360	0.6272947547354020		0.6768964771215000	1.0603210872583200	0.6651781155669010		0.6719738329994300	1.2443680504317400	0.6590408486803370		0.677	0.798	0.62
0.5598566676412240	0.967534339380441	0.5514083739226960		0.622310375557852	1.0743555683550500	0.6052759591762190		0.6533411248650970	1.3408614616545000	0.6358606793103120		0.711	0.97	0.667
0.5523737994606700	0.8891350921811070	0.5507193693104380		0.5324909053999480	0.965940339836079	0.5160461149239100		0.6517431462410570	1.3192401869461700	0.6381385201846870		0.679	0.903	0.666
0.4941926065398930	0.8459662465525160	0.4938234589397620		0.623783981750613	1.055614418633840	0.5991855934217090		0.5532587669536490	1.1280506355647000	0.5357915133846300
0.3437792242249470	0.7595499479068340	0.3296505769807610		0.5201845200799260	1.0225837333398200	0.4955770031075000		0.4696715959856760	1.178795881235080	0.4454650085708780
0.4359866816097480	0.8132520372463530	0.4207971451592450		0.4386525109187170	0.8611112174703900	0.4218545430975490		0.477586734914302	1.09940876655794	0.4584816882421740
0.4323732855131370	0.8783001377314850	0.4219679009774110		0.3873946932706340	0.836448221060697	0.3666685413238740		0.4192062516173020	1.0390493905276100	0.3964561173414710
0.5378224548186800	0.9940496520453790	0.515509110690247		0.5209925786279390	0.973900328791226	0.4953221083176570		0.5926491598875020	1.2371123285406800	0.5704442507096610		0.606	1.113	0.508
0.5852757361755680	0.976419127018658	0.5751576617441480		0.5485759710563710	0.9568131590959120	0.5331550953854170		0.6034445260272150	1.1983897940181100	0.5873097391145310		0.603	1.106	0.589
0.5542911371809160	0.8404135511145500	0.5543035348580760		0.5965865443092330	0.9641934584508150	0.5866492947149260		0.5984730480373330	1.1611039115402300	0.5923186241295490		0.57	1.05	0.555
0.5046429881317030	0.8322487640518560	0.4953719854196540		0.5779853698544620	0.9594027581302430	0.5640126633420080		0.5779350974205160	1.173776952225940	0.563322639177378		0.553	1.054	0.593
0.5513441190879870	0.8859900512210420	0.5430069729571090		0.5462576564105200	0.939179429078452	0.5301727521624030		0.5784019497418740	1.186650524765170	0.5614156052060560		0.549	1.052	0.583
0.5305328827816440	0.8925999314235820	0.5171805695829250		0.4999300842704250	0.8853691918286830	0.4844920105716880		0.5508467812726880	1.1171798958110000	0.5368663839616550		0.52	1.017	0.56
0.4867718815280450	0.8766695897956530	0.4718295908003340		0.5574968943446700	0.979915889352876	0.5370389783677460		0.5345441439515600	1.1675374045422600	0.5192800087398830		0.518	1.024	0.603
0.5092763492072680	0.921874171489498	0.4867334162976650		0.5100735383476960	0.9443869721132400	0.4886904557208990		0.486077387275542	1.133260347531270	0.4664722803390100		0.465	1.024	0.571
0.4318901640788670	0.8075533556965610	0.4223774941144130		0.4631862302166190	0.861450566133455	0.4507286817425160		0.4767594333282940	1.037119222494450	0.46360282639236		0.455	0.937	0.608
0.3420512003376110	0.7559747044089830	0.3203478232499520		0.3397295926759920	0.736751435447943	0.3223397071944010		0.4239116704220040	1.1144338660370300	0.4029570578870190		0.406	0.938	0.611
0.4002556897195430	0.6973221986405910	0.394120857849672		0.4987498009579370	0.8593946831841530	0.4808315310823610		0.4760874006555190	1.0038933850137300	0.4621919433014210		0.462	0.889	0.602
0.3640254020567320	0.7091792215282950	0.3531735261318670		0.3700922252549100	0.7053751480610280	0.3621137259247190		0.3467264721708200	0.7730884496843830	0.3369489389217570		0.332	0.836	0.605
				0.4107481838739540	0.6685996476757810	0.4061657566890510		0.3637013002321650	0.697911652750463	0.3504894114262170		0.343	0.753	0.548
0.1456954212850120	0.35274133338524	0.1369376133112350		0.2716376355764230	0.5125527452025610	0.2658713755872290		0.2901488229504690	0.5965602046850790	0.2777342074795570		0.275	0.723	0.512
0.2711610124860680	0.4564424404643380	0.2663323008101110		0.2971217353440890	0.507591338884935	0.2967243932888360		0.3651598143201040	0.6245456985409190	0.3562611240192810		0.346	0.763	0.552
0.2810737272323920	0.496948746491886	0.2730690222529120		0.2685310685129260	0.50178638361845	0.2645999878782330		0.3285436336804640	0.6538392814868300	0.3177019568734850		0.315	0.718	0.516
								0.2598285220887330	0.4964764217771970	0.2500348244311220		0.283	0.735	0.54
				0.6867259595584320	1.3038498014787500	0.6403800866837730		0.699538231734064	1.378200396563010	0.6685325692667060		0.724	1.261	0.72
				0.6457234661304130	1.2450246184984600	0.6154536440701730		0.7658884870573460	1.4777523106686200	0.7424391749917920		0.783	1.315	0.786
				0.6929008659422740	1.3087851705084700	0.6781011269392540		0.7764305775227210	1.4905301623432300	0.7555245340846370		0.793	1.325	0.804
0.639773030919106	1.2051466182603600	0.6298392782842840		0.6970564182716840	1.3005514376794400	0.6611354879057280		0.6979392222782370	1.3589168826278600	0.6689732558040560		0.701	1.242	0.703
0.4849092685772060	0.9909949396527630	0.4656793542266420		0.6385573910344380	1.2115044902592900	0.6133272343747120		0.67578328512848	1.2806214601477900	0.6579557311661220		0.691	1.192	0.688
0.5333503125150200	1.1327378666344200	0.506514588447356		0.5845661598195330	1.2179205536557800	0.5438680685908330		0.6682056203146570	1.4133053487636700	0.6284434058284940		0.69	1.256	0.679
0.5438156254352720	1.1108925738025700	0.5163420175954670		0.5651463813085510	1.160924416199390	0.5316185223793970		0.5789079385316900	1.2349595620491800	0.5534387054778600		0.588	1.516	0.589
0.4603479555878390	1.0703202153829500	0.436714397695866		0.49451902367554	1.13010774723218	0.4544989209935520		0.5700045538763700	1.3263358254281700	0.5384710716482860		0.551	1.626	0.546
0.4589311469754340	1.0770670105389700	0.441931555105754		0.535025462807447	1.1829017953947700	0.4992562062430270		0.5908289683279940	1.3443243958823600	0.5555749662009990		0.555	1.62	0.368
0.4165039833396650	0.94990274272046	0.3907948174176360		0.4962170980379110	1.1068655886236700	0.4629013704119760		0.4712438472768900	1.1472016591159200	0.4387681161631340		0.476	1.23	0.332
0.3065870121576610	0.8764571146173040	0.2796021020740660		0.378288802300404	1.020994292041690	0.3406058895062660		0.4422518883813240	1.1946753690975600	0.4105595791463280		0.425	1.241	0.259
0.3565186668412040	0.8914074821480450	0.3190669212960590		0.3720236710868900	0.9650939502625900	0.3371494364138700		0.4404540101728090	1.1293014929430700	0.4004983122869260		0.413	1.15	0.258
0.3384225643725610	0.728128221070807	0.3035541021420110		0.395954465857015	0.9831451657578330	0.3613529222460470		0.384332619295041	1.087491138431640	0.3569847124772830		0.357	0.92	0.264
0.2331064405122760	0.7980798457643600	0.2073335548869500		0.2596121431618220	0.8103408936181000	0.2190763296425890		0.3162564963021940	1.0127041528146300	0.2903666076422480		0.491	0.741	0.477
0.2452765767063510	0.8448693653931060	0.2146475760516940		0.2880063807900860	0.9270658513599220	0.2640224362558970		0.2929695060049610	1.0118898709284600	0.2651613074541620		0.54	0.703	0.528
0.2812865747401820	0.8630348160253540	0.2579816509973470		0.324957974645307	0.9483732996504060	0.2971789484357400		0.3034012102083390	1.0148097350447600	0.278582973450545		0.487	0.761	0.466
								0.213252838892138	1.0182347090022200	0.1916018177019670		0.243	0.99	0.185
0.3911565361810050	0.9096664954232890	0.3677693582375360		0.4330597994667030	0.979432622828311	0.4017685233129460		0.4120505950188270	1.0384715772501100	0.3817810789898860		0.404	0.951	0.257
0.2788186378282370	0.7990322594808900	0.2525120085453350		0.3284314558332640	0.893817138135698	0.2969081270079300		0.407969924799924	1.0767874369729700	0.3828994917798140		0.393	0.953	0.272
0.257282147843179	0.7968410435171810	0.2229610235204200		0.3069491312994150	0.8867026532653360	0.2775184049615860		0.360402187808467	1.050374390005620	0.3327602230894490		0.363	0.911	0.229
0.2429827368649160	0.8223729778106300	0.2130497783532700		0.2894566793476150	0.9286422231679840	0.2584499223784700		0.3375235580376600	1.059628216182180	0.3074017080655120		0.317	0.924	0.237
0.22509787338736	0.7883322073772490	0.197453989409074		0.2680703032942980	0.852298704860292	0.2412358335439410		0.3038178458273420	0.977861754534456	0.2745383578913940		0.435	0.754	0.406
0.1885738386534800	0.7478118089268060	0.1638248906500100		0.2537434534234400	0.8903463025999030	0.2264034035663050		0.2716771717521730	0.9656327815622030	0.2466394457725920		0.512	0.694	0.494
0.2207472086160100	0.7467731511283850	0.1977265938371840		0.2760370808538120	0.8460672672690980	0.2515449723398680		0.2821132544514750	0.933037601061028	0.2558609309325590		0.488	0.708	0.475
				0.2753867273344200	0.6737311089420970	0.2569478708866320		0.2696861300025410	0.6831492664398640	0.2547230976633980		0.39	0.448	0.377
0.9101616424399430	1.3809242867729700	0.946840837764665		0.9869563797453410	1.5038331089221000	0.9912503827100250		0.937881081690222	1.4307893271892000	0.9911945289171050		0.932	1.257	0.989
0.8042363334592810	1.3663250582370900	0.7894427905165730		0.8512908847467140	1.4899138605547300	0.8259569217744260		0.8852242782164890	1.5943630032820500	0.8802193068667070		0.884	1.204	0.92
0.9313849802087180	1.5129015787423600	0.9298320987749640		0.9520181203531110	1.6205648379906100	0.9428650597761050		0.9639724459100340	1.674766642609280	0.9629292170930470		0.96	1.205	0.999
0.8492453390990190	1.2759669066089900	0.8742617601073600		0.8746448528658350	1.3096191430331800	0.8849452445839620		0.8620899206755400	1.3641022038735900	0.8842954892388600		0.871	1.153	0.923
0.6938186051950750	1.0833848377523600	0.7062291668281900		0.7923847120236020	1.2024105959441900	0.8054988574876350		0.8240230974112090	1.307863570289060	0.8400218636331110		0.854	1.106	0.896
0.811162210868589	1.2533696396612400	0.8185570281358130		0.7173883491377660	1.1417117849536900	0.7293971252123280		0.8409429573586510	1.420201403314470	0.8518105394863200		0.857	1.19	0.892
0.7458839805714850	1.2064746526924800	0.7478156222864810		0.7394336066439090	1.2119587933800400	0.7272020214901970		0.695503563802038	1.2168705607077100	0.6828483222452060		0.688	1.272	0.711
0.7158923012003490	1.1373149253882300	0.710805701294644		0.7524909107905990	1.2318564248609700	0.7462066010069870		0.7542462676842990	1.29200419538206	0.7527483041322010		0.737	1.273	0.766
0.666101568610126	1.12595370373711	0.6393594129306450		0.6934305763928960	1.2123845620070100	0.6696918797711880		0.681285011532102	1.2818010498489900	0.6705857082277970		0.687	1.216	0.702
0.6391648222524020	1.019831890445420	0.6284218119845440		0.6967591868623180	1.1504093443976000	0.67823364119257		0.6614213386241540	1.2016234323753700	0.6488914980573190		0.659	1.139	0.528
0.6157656938886700	1.0626673596816500	0.6027959139120780		0.5723586808932480	1.043505108902870	0.5530893855871300		0.6222131983165420	1.2104676453632700	0.6032512125160010		0.615	1.113	0.613
0.6609442802344390	1.1474141916541300	0.6345563411868430		0.6047998173889040	1.1098681950096600	0.5841778699202050		0.6307743517221100	1.2720223381338900	0.610000306974532		0.633	1.138	0.63
0.5036637898355260	0.9717492367258270	0.4779657458901910		0.5132121522147060	0.9778870515488560	0.4987311833569320		0.4764483906991730	1.0133286556978200	0.4562366556241960		0.472	0.897	0.359
0.5120967387662200	0.9359476186638870	0.4865747743808180		0.4404284375847060	0.931006660305353	0.414694845294527		0.4630618950294600	1.090257091283730	0.4383894282414610		0.464	0.977	0.348
0.4871751717251210	0.9193051863550700	0.4657725946452110		0.4754151853728660	0.9817624399202750	0.4522221398177310		0.4698769753081360	1.0975990343785000	0.4477894602249110		0.464	0.972	0.35
				0.3950899761840100	0.8455536542724130	0.3768730018322550		0.399405944309311	0.9327347452383040	0.3834152721855280		0.557	0.598	0.548
0.3551369006550550	0.8418335673272010	0.329035032615556		0.3504150808012100	0.8847312851350470	0.3193818556691270		0.3086974398868310	0.968606207152402	0.286665399859732		0.321	0.868	0.218
0.5109075831156560	0.970155536787235	0.486377694321451		0.571084246105542	1.0918876880273200	0.5394397982892820		0.5457279354085560	1.160447753383350	0.5176913999673090		0.608	0.823	0.593
0.4018281099169870	0.8362486511541950	0.381326348838275		0.4840535052208580	0.9746983985493700	0.4557421534525470		0.5123470651540000	1.1157695192945500	0.4909349565948630		0.595	0.82	0.582
0.4971918658957970	0.9605476261526940	0.4680258025471430		0.5400048704839430	1.0644166838670000	0.5095792223943100		0.5379370962848930	1.172971257411380	0.5169018841811110		0.625	0.947	0.464
0.4167791065870210	0.8756726815879330	0.3947342086666130		0.44944043679457	0.985592213745672	0.4198922031652950		0.4883799825794130	1.1444735980810000	0.4624081076769650		0.564	0.969	0.41
0.4170523688704680	0.8819946648834850	0.3875328634397950		0.4560302296118150	0.9797044519105570	0.4256166182193120		0.4800514199041080	1.1256555790305600	0.4541892000993730		0.531	0.973	0.376
0.3881399888130650	0.8772756259375640	0.3603128057851200		0.4170963422328280	0.9425907322720450	0.3895169169240580		0.4454006247126210	1.0879460464291900	0.4217951047337550		0.489	0.981	0.384
				0.4251270284569050	0.8825802003500010	0.4046542225249780		0.4379831872405850	0.9900629650273690	0.4168501255103080		0.472	0.904	0.349
				0.39797338279863	0.8548994294190520	0.3680005225246240		0.4116702966144510	0.9480619686147060	0.3890183358516300		0.44	0.868	0.328
				0.4099188655257580	0.8157904708517110	0.3882267403610030		0.4189578556926450	0.8684188156744310	0.4029922556483440		0.455	0.831	0.357
				0.42534417193375	0.8389519561487460	0.4027426260181900		0.3823081718697190	0.8206517116838770	0.3627760850463380		0.413	0.833	0.317
				0.3793139284929900	0.6952422481373670	0.3663202428381990		0.3463357052787580	0.6861212179715040	0.3307922558815670		0.366	0.721	0.305
				0.2713023511349740	0.5153382474165880	0.2636842234725340		0.2802339113718850	0.5682521255127310	0.2750721101042460		0.299	0.606	0.263
0.993048954638367	1.6336853819863600	0.9729763147195230		0.9600155232227930	1.6754895362346100	0.92263723479327		0.9198180913992970	1.7024417869355100	0.920082759488124		0.902	1.831	0.942
0.9210351146213160	1.4687507004757300	0.9211750993553560		0.9369299302267280	1.5565827777333500	0.9134298790213880		0.9331656699931430	1.5868974361033900	0.9342568108604190		0.881	1.714	0.931
0.9280071342530890	1.471265488260520	0.9437429886626830		0.9805864351992090	1.5958600281532800	0.9648737098747170		0.999981683602788	1.6621441565841900	1.0154242381664100		0.943	1.756	1.005
0.901632318547294	1.4192086467858100	0.8980070121802720		0.8275507850441770	1.3358553427513900	0.8153978328248350		0.8553465031960750	1.4620228071133600	0.8514702379037540		0.86	1.132	0.67
0.8678037211080040	1.392160350793870	0.8555840290644780		0.8579356152265850	1.424757300126250	0.8519921955338710		0.8897679108409230	1.5859854144457600	0.8847690504195030		0.909	1.217	0.936
0.9433706176180880	1.4946728624444800	0.912860052985441		0.8634901719134270	1.4336899060474700	0.8399431125266600		0.8887373588983430	1.6031522719472400	0.8819309981670750		0.894	1.209	0.916
0.8093570213710730	1.2657044959230400	0.8071609820213930		0.7853155384453220	1.3421258863598300	0.7621715287368080		0.7827010374556390	1.3933730812661900	0.7715890907532970		0.75	1.125	0.763
0.6202578663566190	1.048941364674310	0.6074889689420440		0.7255998530594700	1.2738696206788000	0.7031457772042850		0.76902967904563	1.385941946331470	0.7524680154658030		0.747	1.1	0.755
0.7821376194978350	1.2724555822308300	0.7643561241374230		0.7745628466599630	1.3382846716295500	0.7567898006537330		0.779838171210465	1.4212305638813600	0.767247346076187		0.771	1.11	0.607
0.6904725970284920	1.1399245635628100	0.6753960622025370		0.7595783207830300	1.2677320270269300	0.739949674809906		0.6898332418789840	1.308654984228040	0.6754624214355910		0.669	1.072	0.523
0.6573871483113680	1.0620644684632200	0.6486430337460700		0.5987799367397120	1.0431593714719000	0.5876523000330520		0.673612236350895	1.2451314341186800	0.6659331513667200		0.667	0.999	0.524
0.6159921289508080	1.019326853740650	0.6011031018263750		0.5583749045617580	1.0077570506309700	0.5402488210939000		0.6286274449845170	1.1910686333268100	0.6135664145947340		0.631	1.003	0.53
0.670637984196588	1.128952372281290	0.6586401757900450		0.6194182230075920	1.1113353334122300	0.5972223193411570		0.5806772906060510	1.158789114775570	0.5684313183415700		0.609	1.222	0.488
0.5316118850857680	0.9485487744401390	0.5118298474234460		0.5179388220501970	0.9843861155448830	0.4965707233472630		0.5050490400934880	1.070658140380870	0.4877358578825760		0.507	1.191	0.398
0.443109175386539	0.8116685964344140	0.4257597208999490		0.5360662366669380	0.9924920505122660	0.5168678179093560		0.4948439726774560	1.0486142234915400	0.4834920466292500		0.474	1.167	0.442
				0.5532165965311650	0.98524617112546	0.5357370534767740		0.4785585360984250	1.0106535030873100	0.4619594554965680		0.473	1.034	0.383
0.3220537319342980	0.8792121505488140	0.2989119167808300		0.3273716831199970	0.8994476846532070	0.303946495536345		0.2944811053233070	1.0321876324409000	0.2757430847813180		0.287	1.021	0.23
0.5133965151014390	0.8980219571012740	0.4998129783134190		0.4863895296702290	0.9588304628379460	0.468203496384328		0.492143944504672	1.0012240233228100	0.4792206147624630		0.188	0.651	0.227
0.4034628257413520	0.7945193581767960	0.3866582562610820		0.4543140788451700	0.9069440699603830	0.4334645320206190		0.4787151916512910	1.011677507701190	0.4600412879025670		0.537	1.55	0.368
0.4611799784468290	0.9105068833222650	0.4396250054968280		0.4806088294073740	0.9871235195691720	0.4563368451907500		0.4784530671296890	1.07178503005357	0.4578104902308040		0.458	1.525	0.312
0.5276261115727040	0.987032847860087	0.506537183716272		0.4298581783937400	0.8893518445533280	0.4063288134980520		0.4609454245042370	1.0345463494798000	0.4442418647407060		0.444	1.555	0.256
0.3461333812870910	0.7349991935175310	0.3267603417925030		0.4137075696320900	0.8814777473589410	0.3917731803322340		0.4099940184239210	0.9426519885858850	0.3893124042848290		0.433	1.544	0.334
0.2502193920960440	0.5828475168977780	0.2417437943880470		0.2486797114115410	0.6299512337429480	0.2368943640796960		0.2051016031845160	0.6427629494166470	0.1932265538077370		0.416	1.51	0.291
0.3339313500278930	0.747377377699556	0.3180626306557550		0.2829365293560020	0.7106030633063050	0.2666520544358250		0.3136207809464400	0.8306531143809930	0.3005764532381420		0.294	1.267	0.193
1.1365001093244300	1.835819439440480	1.128982440480250		1.1271093256819100	1.8257593671904000	1.1061250826200800		1.1170094944029000	1.9962836431770500	1.120295935069690		1.078	1.544	1.128
1.1105567398300000	1.7801556676302300	1.134193251169770		1.1276545327390400	1.7929209773763700	1.1333796199201300		1.2119666969780000	2.058851907272670	1.2340027097245000		1.21	1.591	1.278
1.0282580516880400	1.7244225351583700	1.01010432201981		1.0618256012007100	1.7235537871576400	1.0574140443165600		1.098304136097030	1.9439598319082500	1.109843773137540		1.112	1.478	1.157
0.9914354288575910	1.7180491798993100	0.962454934940692		1.0374943086319200	1.6770117851876600	1.0053217981612300		1.0309456596266900	1.8763092643725500	1.0323380156299100		0.99	1.896	1.037
0.8804322271310130	1.520968506190590	0.8869336798217560		1.0061936411602400	1.634011790050180	0.9800626591667420		1.0418422824587800	1.9068178003735300	1.0545530002497300		1.003	1.902	1.053
				0.9558388057097200	1.622312726635280	0.929086647065766		1.0338819144565000	1.986191868079370	1.0356268874971800		1.001	1.965	1.048
0.8573790744168590	1.5292550814081000	0.8451033806532780		0.8686608473933280	1.5124985757165900	0.8332587592875720		0.9171626926998240	1.8307970579332500	0.9008361445810890		0.958	1.851	0.707
0.8370666165120760	1.6379721595781700	0.7857315592543960		0.8064909672487360	1.4729769087775200	0.758898243348401		0.9051817160067260	1.9135496735928400	0.8803083399025890		0.969	1.834	0.681
0.8232089486590780	1.453223737462200	0.7694958673820640		0.7593175349627710	1.3379098050188200	0.7282366215882540		0.8519257678700930	1.7608435671682900	0.8372743618121850		0.861	1.816	0.629
0.8246117416223510	1.4793155134009800	0.7624302527798730		0.7770255424150690	1.4066025692599000	0.7401146892497700		0.7577083196334770	1.7138383955865300	0.7314762042294410		0.769	1.86	0.568
0.678998311979081	1.3158317612223100	0.617653704952339		0.6187782385661030	1.1961050766007400	0.5782889408665590		0.7104653004456140	1.6583883165364100	0.6853414556944820		0.673	1.808	0.492
0.6743223044833560	1.4120309278724700	0.6058002028411880		0.654056863639201	1.251916386421370	0.6049168682774210		0.6868635213877400	1.6468727824057600	0.6545599651948470		0.634	1.752	0.517
0.6643273057580540	1.2820132048976400	0.6207197358346110		0.635521057558124	1.2413299741559100	0.6029771023745660		0.6505225830212380	1.6000479382980300	0.6280988720545560		0.57	1.114	0.434
0.5099184590132240	1.1346289429435200	0.4754652664970410		0.4925708575237390	1.119922949494110	0.4575642393473180		0.5418272646448320	1.5065447688778000	0.5155104474869650		0.689	0.955	0.676
0.55462211500661	1.1570832773576000	0.5105417581525040		0.5231852332668910	1.089889822100810	0.4790361323846910		0.5334750838129710	1.4981069606565600	0.5029386485896880		0.521	1.242	0.466
0.4906222968227310	1.097397927243210	0.4620512134960950		0.4698234666543550	1.0363894156415800	0.4368325582206960		0.4427453417631720	1.433638881556910	0.4153080164000390		0.43	1.196	0.418
0.370825423407916	0.9296807255789430	0.3466246570620320		0.3907200383119630	1.020044233337530	0.3656599232739290		0.3376154379251960	1.2610394972275100	0.3162394284703660		0.365	1.068	0.399
0.491461898539677	1.0913891336453000	0.4574140431075600		0.5139179938062200	1.125411178404130	0.4818200424190000		0.4673607822408690	1.3683823293841200	0.4437673162790730		0.477	1.189	0.378
0.488672742643028	1.073210632106330	0.4484285501981100		0.4971235713649870	1.087812247318480	0.4662097422741610		0.4982237245945020	1.3311395849321300	0.4779503645265690		0.48	1.14	0.434
0.398951923341436	1.001770866983780	0.3611498954793760		0.4923782006127520	1.103733688738210	0.4624523190258410		0.4532798295204130	1.2901750551479800	0.4327871336608250		0.432	1.094	0.436
0.4176585906148440	1.0029581363896000	0.3867473310896230		0.4370497664222000	1.0061539218531700	0.4120299510502670		0.4500876689360800	1.2992907613844200	0.4296137039369590		0.438	1.078	0.442
0.3753157196207650	0.997990024735956	0.3483156692336580		0.3688896558738990	0.9638169163497750	0.348408001009338		0.3922260219461490	1.2205406832474200	0.3738863207606070		0.388	0.983	0.426
0.3895705201799420	0.8488162336208460	0.376449853980792		0.3658366380016040	0.8539126421868260	0.3510569282355370		0.3473381087916400	1.0765167931293900	0.3334723909033740		0.34	0.852	0.45
0.9812169034050940	1.931631408739760	0.9074964881652630		1.0462044989903800	2.014316984577440	0.960091754529377		0.9794339738794490	2.076323712263550	0.913499967555794
0.9262420441083830	1.7662561554323400	0.8788982719238170		1.0076663470569300	1.898164435584090	0.9292185818976950		1.0069315308716100	2.081202711594370	0.9572175471150370
0.9229884473159740	1.697115330884330	0.9081185308687000		0.9742743451996340	1.7828683398369300	0.9252322349164800		1.001001195119710	1.914506360237030	0.9883282272162230
0.8099125456503610	1.5318182842977300	0.7636154042834130		0.8516774951175180	1.688286462821740	0.7909783483999760		0.8419471424178650	1.868832504206990	0.7891871948069860
0.7579129659806270	1.4621903689330300	0.7166920422161960		0.8313270155258530	1.5897916496276500	0.7802373088738980		0.889063649367399	1.8190287454469200	0.8422820779613910
0.807484751293949	1.6069180039544100	0.7641247993244510		0.828930170092583	1.6723284656700700	0.7620677796105740		0.8630765641847120	1.912855884932470	0.8185132227034260
0.8546775517473220	1.5395114648670100	0.8111720951355030		0.8930525255260820	1.5943540448560600	0.8401419923971580		0.8153326258100950	1.689662837230250	0.7852019076030690
0.6831944869113610	1.407227271253330	0.6373952920085710		0.7202453941394400	1.4877327885214100	0.6735231599459340		0.8194006839549960	1.7833740741542000	0.7786071513680220
0.7158682157718490	1.489878283603660	0.6559659276195080		0.6997552506751390	1.4815071087986100	0.6432769635039260		0.7868580045020000	1.8076360425060800	0.7220088381299410
0.7284636284838230	1.4435030160998400	0.6893339956038970		0.7459417294912510	1.4596503608918200	0.6915507432513490		0.7391019837605740	1.7362618383193900	0.7117178164122600
0.5726224783794650	1.2043843807826800	0.5342735078168240		0.6418257428343600	1.3004525550012300	0.5943537366532650		0.6748627882852920	1.598911449826890	0.633948490449062
0.6602351000554790	1.4123793930593000	0.6134447225127110		0.7686573626053690	1.530856970635070	0.7140248575499470		0.6986286635782950	1.694983492475010	0.6463621323851020
0.5043416416270800	1.2193167933735900	0.4598593151880290		0.532370417770065	1.281068533585380	0.4846989578583730		0.5023497503297700	1.4788083079463400	0.4615142073239530
0.4612134772337030	1.0660261535157800	0.4280100954342490		0.5125491349404190	1.159452610762720	0.4752448187709290		0.5436353292646980	1.3696706477879800	0.5107547140404170
0.4009882774465200	1.0767921385073400	0.3594476898795850		0.4795385265862220	1.189161890256660	0.4312180431267420		0.5223002561422030	1.4712582685445600	0.4801489542582340
0.542799932268768	1.237270674934880	0.5032713820093550		0.5732990034178190	1.3069383801970900	0.526517329845537		0.5043655770930230	1.4138771490291400	0.4646781029914880
0.4143150227473120	1.0913494309795600	0.3793823737164050		0.4906666942051080	1.1968839320321400	0.4508533698723650		0.4180856689832320	1.299653371660950	0.3825037220931210
								0.3669316497837710	1.554728313238480	0.3228848343115390
0.4886487594660600	1.175981373467650	0.4406525149588110		0.5194987520965460	1.2565382049316900	0.4680588502960020		0.6088454946595770	1.5727898433540300	0.5741853096126930
0.5201032880985710	1.1492190703199900	0.4835872440139320		0.5594681132184530	1.228821988846170	0.5220344965734160		0.6056284379908770	1.4829779423613400	0.5658044080953530
0.4606986163162690	1.1024658715171600	0.4207635275953550		0.5536236490477770	1.2310375734997800	0.5096557231672590		0.5757609015797930	1.451287766332870	0.5437873540311100
0.4617629519217620	1.1164138910350700	0.4233755498537000		0.4682638001731180	1.1383927152230800	0.4281615066011100		0.5250017838554660	1.3599579957876100	0.4859057116484810
0.3732637701153610	0.9728797639776490	0.3420164277035590		0.5018074589723720	1.1539843367126500	0.4631092093809590		0.54683442269341	1.3395537318241200	0.5143671123592380
0.4408564432357960	1.085740665887890	0.4040674493490150		0.4763140574089480	1.1391697069440400	0.4466668975956010		0.4472931947501040	1.2445032601422600	0.4099688014070200
0.3730018919122530	0.9349421771666110	0.3401028865880770		0.4592732276772190	1.0828492601571200	0.4287007584602840		0.4869315243868470	1.2207179837957900	0.4478064234461070
0.4143992976759150	0.9253481839495780	0.385953878279816		0.336993357107885	0.8810833563037960	0.3128250823985050		0.3963683176525990	1.0438633847733400	0.3699119450413460
								0.2044356233500080	0.4241062336089950	0.2437698032029490
0.9581285771949580	1.4747621622640300	0.9644597823101180		0.9595332562199670	1.5122476147607200	0.9381489706160760		0.9213699423963	1.5576823054926300	0.9233123903026650		0.917	1.458	0.962
0.949284531585172	1.573816623660460	0.9467845640810750		0.9699799899329350	1.6268065656707900	0.9675787341163430		0.9724306621266820	1.6982701287039600	0.9749916299356080		0.951	1.539	1.001
0.8398009906149200	1.3805289042332600	0.8650470375178910		0.9417042455284900	1.5441482023747100	0.9393395642616380		0.9798399945369550	1.6766950756881400	0.981738226067964		0.952	1.465	1.003
0.8497981402067670	1.3734121779872500	0.8304000335571220		0.8173368193290830	1.3918281586110900	0.7944454746825150		0.7914334036585700	1.46134427977438	0.766263079922843		0.791	1.165	0.797
0.7839657545470620	1.3557782952085800	0.7782028943470470		0.7861463870613850	1.393809001534970	0.7677847745989440		0.8655319716895160	1.5943225953930300	0.8519260896072090		0.872	1.286	0.886
0.6513994259404480	1.243011944863280	0.6284514809826300		0.7143908141588330	1.3577455464515300	0.6867401434919810		0.7901500523794490	1.5664668674061000	0.7685615330883580		0.834	1.273	0.83
0.7276140086032280	1.2112820124521000	0.7001986262925420		0.7984261129904470	1.390196392141090	0.7753673805903120		0.752918522819611	1.4004289530272400	0.7278013071169930		0.77	1.359	0.778
0.7234112041095500	1.243173670848930	0.7065390797027740		0.7075323766649330	1.3253104373457100	0.6748891873921260		0.7396153016540690	1.4629157901730200	0.7153847546373430		0.766	1.443	0.769
0.6621034213235620	1.2547027402420600	0.634486579175833		0.713151610654092	1.348130544121990	0.682271026873433		0.7344518361399620	1.5099542829525900	0.7091293621879900		0.742	1.434	0.521
0.5703792935791490	1.1094212335509500	0.5497162659952810		0.6788901872900020	1.3074682663733000	0.6431776160288070		0.6177722093740510	1.3256591772850000	0.5841548142678180		0.634	1.295	0.377
0.5723410375963570	1.1165572583130600	0.5431321294855220		0.5244007894971810	1.1032379215139900	0.489042889014641		0.6317874488619950	1.331602065530930	0.5963098319139990		0.642	1.325	0.415
0.5931753252126300	1.1429381557249000	0.5643516341790450		0.5653053871718540	1.1771688313964300	0.5204114501346260		0.615961933805898	1.3306153782626100	0.5838426182607810		0.604	1.32	0.391
0.502248578665178	1.0443913608209700	0.4770583135248300		0.5635269586195830	1.1135777799355900	0.5309939293986040		0.5343844676239230	1.1893877411110000	0.5075796188537080		0.522	1.087	0.359
0.4113366360271150	0.9488639655584410	0.3827818512231270		0.4567165156491910	1.0101702819244200	0.425236088585751		0.5164833245510310	1.191678225438570	0.490962715105494		0.508	1.082	0.347
0.4047928265446220	0.9553238685933560	0.3773054493435360		0.4593352149014080	1.0227272616301600	0.4266580617240810		0.4895827084295810	1.1545643799594200	0.4622463258963730		0.482	1.077	0.362
0.4333846138872500	0.8729233701852810	0.4039739021257800		0.4009792397874910	0.8387483299814980	0.3781854110592280		0.380157843404905	0.8725831003920580	0.3609245330439640		0.37	0.8	0.329
0.377543286358462	0.6626672925993980	0.3702903302600900		0.3092182873622240	0.5745600907345150	0.300349432331035		0.2967568993607960	0.5771190903574050	0.2854580254520390		0.286	0.592	0.312
0.5695360919532190	1.009166608910440	0.5514330955307670		0.5807959994442970	1.013479111089050	0.5635452174986430		0.5434906453070950	1.0039640522559000	0.5204027390095240		0.609	1.039	0.475
0.4626628418639860	0.8892697280839840	0.4495281375881810		0.4985315381922680	0.9169301540046980	0.4797915417071580		0.5256983425396410	1.0038080982926000	0.5057499463964580		0.604	1.189	0.445
0.4203174461378470	0.836818100595373	0.4076315394246970		0.4978289594809630	0.94872781402088	0.4754054760254910		0.512859461558302	1.0332929385918100	0.4912828382176320		0.521	1.231	0.381
0.4886312366568580	0.9251590667296990	0.4644067952104210		0.5340178733243980	0.9697763298284590	0.5113026897430060		0.5197158696332620	1.0136653001915600	0.4992209891310390		0.488	1.147	0.379
0.5117767559980330	0.9869608547522780	0.4902764904703370		0.4996903866821460	0.96083090327383	0.475165520182341		0.5029529598566380	1.0180695709550000	0.4753051081099560		0.463	1.125	0.412
0.4661759299014020	0.9403715662224580	0.4437839857405230		0.4465895313049310	0.89208182107503	0.4229013099999990		0.5070059881801800	1.016094533677300	0.4878742174098050		0.478	1.075	0.403
0.4650901355249520	0.8661738196454060	0.4473663194906840		0.4560832502371780	0.8456206420989960	0.4380871239308060		0.471339449927692	0.9070041658866560	0.4535011137653580		0.455	0.962	0.406
0.362324643691815	0.7909465369570030	0.3405034844793940		0.433887149968549	0.8804559089689710	0.4131067434614250		0.4591508704845030	0.9815646678224310	0.438919172563926		0.444	1.004	0.414
0.4652698729041620	0.8801830102323430	0.4436332959589700		0.4431920666144630	0.84913146606492	0.4233569058885760		0.4697066803936050	0.9244199749065960	0.4486292651496420		0.443	0.918	0.387
0.3548887704582680	0.7920126047321360	0.3390108347178750		0.4650666895570040	0.9043895509902940	0.44644505580167		0.4459937261089080	0.947053653977764	0.4272938895857840		0.42	0.891	0.417
0.3520409759274010	0.6685502196288550	0.3510401378286470		0.4094495653299610	0.7353952680611880	0.3986707499730940		0.4485125361002680	0.8080097132856740	0.4337751230357430		0.472	0.846	0.47
				0.4327403481082030	0.7935400721252950	0.4182898990598680		0.4392364104793480	0.8506123922056990	0.418275924972728		0.439	0.856	0.435
				0.4165627149347470	0.7669124224191860	0.4039142841796450		0.4196743616199230	0.795110750085405	0.3950257556162510		0.401	0.777	0.412
								0.4137095763111130	0.766548349159575	0.4017534385150030		0.407	0.728	0.453
								0.3701916971515700	0.6390598553660990	0.3685244431769360		0.365	0.572	0.423
								0.3238296016823580	0.6120803998830520	0.3195220137647790		0.364	0.666	0.446
0.5935751286789900	1.1407047939858400	0.5703685385574640		0.6218996653902670	1.182803311377030	0.5973175996848770		0.5631071895654430	1.2501424771909100	0.5336871111070880		0.541	1.047	0.348
0.5487389228349430	1.0367875719810000	0.5264411098992740		0.5036941857778470	0.973335759261362	0.4794622442037100		0.4873571310189010	1.0659357501977000	0.4609496431883380		0.491	0.947	0.347
0.4951098219546760	1.040174455076070	0.4771225355997730		0.5046724649260980	1.0727037635014800	0.4744074792406100		0.4731250190868130	1.1813345643048300	0.442262441714443		0.461	1.014	0.301
0.4306166801123250	0.9753134004460130	0.4113150047814480		0.3844818250174820	0.9099870423017010	0.3578840538520310		0.3934800702674700	1.071038303756360	0.3668634568597410		0.397	0.863	0.299
0.3669635211511970	0.8753289779813150	0.356346105225435		0.3339520174302310	0.868447137275264	0.3119016997934100		0.3790036390120230	1.0710087441970500	0.3591995448538400		0.417	0.798	0.389
0.3301855359184310	0.8163325570916990	0.3129468796408520		0.2810659245423340	0.8331616491195950	0.26015695276784		0.2827598052386890	0.9236516510904270	0.2661163030866910		0.434	0.827	0.415
0.2736564328960420	0.7896720658756030	0.2561012725771880		0.2750266690905750	0.8024645480333660	0.2581607671343300		0.2574325965743820	0.9068271567248760	0.2382440475854640		0.472	0.715	0.457
0.509585932901357	0.818576505094909	0.5001299933882860		0.5527366982603450	0.8809115986860760	0.5396722882559400		0.4859142609151550	0.8299806935086960	0.4788338669889540		0.516	0.544	0.399
0.519978237290139	0.910485652261004	0.503931509004903		0.524233308899933	0.9484252054958720	0.5083296023034400		0.5038149274911510	1.0059312348465900	0.4836381574702590		0.556	0.73	0.437
0.437536376051277	0.8317904796321830	0.413328833389137		0.4549923639102550	0.8717292807739870	0.433350981998148		0.4277177143953760	0.885153074493428	0.4092714068971450		0.468	0.685	0.372
0.3924798956384740	0.6629267614208470	0.3825349976129050		0.3967601803894590	0.6988862746325100	0.3793162270910180		0.4024383689096000	0.7470480406037720	0.3919490844106450		0.433	0.573	0.391
0.3426253119357920	0.6055173015783310	0.3283704287887500		0.4084650076807540	0.7092531775475760	0.3946155159144230		0.3657806231385510	0.6828634322145720	0.3550416661443750		0.382	0.53	0.383
0.3610997915987230	0.561263932215831	0.3469446583392290		0.3273701488415900	0.5526167742081760	0.324896935022171		0.326461379108916	0.5595652472890380	0.3245750226446710		0.344	0.44	0.396
0.3814456955402460	0.5999596340790930	0.3720330753723840		0.3058001482186660	0.5437735593594160	0.2954677534527170		0.3255352238638880	0.5757651216363680	0.3027249003896000		0.341	0.466	0.369
0.2935206063019860	0.5259782092389280	0.2860912424373460		0.2768165064206510	0.51445995970413	0.2648326806013560		0.2717841500738990	0.5198694377507310	0.2621089371953640		0.341	0.439	0.322
0.9792794640540440	1.608217156738220	0.947416213957414		0.9142824288059270	1.5862552824098200	0.8960072005133890		0.98635291167525	1.783988931361610	0.9900207240416270		0.991	1.546	1.028
0.9071645116579370	1.5277752858627600	0.8832935439826370		0.92498108309805	1.596519866400430	0.9033484195266730		1.0077629973356800	1.846318182644680	0.9826262506044140		1.02	1.577	1.049
1.000211946322520	1.7049726807315800	0.991833994437174		1.0103114904846600	1.7260311713681100	1.0011937335675400		1.068584498059080	1.8900552689173500	1.061462971604910		1.068	1.659	1.111
0.8938845233050340	1.5294122765764600	0.8517296742851120		0.8763372743646430	1.5431199960248600	0.8370064098493130		0.881106627074272	1.690410164710740	0.8683033622006020		0.893	1.534	0.917
0.8911740589639710	1.5116802790202300	0.8565304081795240		0.8270456364100700	1.4537897508066100	0.8067421542116170		0.9060828881877010	1.6653192760752300	0.8902370929111690		0.908	1.54	0.93
				0.8482522161162740	1.5281714257050800	0.822676588411522		0.9505182830938560	1.781547296732150	0.9437353570552240		0.965	1.659	0.992
0.7603694172157920	1.3522876963051900	0.7134438565175440		0.7989262827779250	1.4270285197209700	0.7534200487348490		0.7777536515523010	1.5211630055297300	0.7635949547477420		0.781	1.37	0.785
0.7353985877438780	1.3088668745298500	0.7003863583932420		0.7029411470652030	1.2852482105871100	0.6652383242671580		0.8006530490679190	1.5376122968673400	0.7802653052934710		0.802	1.402	0.814
0.7543848379063010	1.377453814903660	0.7341862564188040		0.7434418448598830	1.3549419273637500	0.7154330001357180		0.8154770266178060	1.5517640655812100	0.7811597015070750		0.801	1.419	0.809
0.6765701117178860	1.1781059620967200	0.6525266120766230		0.6579674723689890	1.203711464744760	0.631539997073733		0.6886314336552490	1.334052480500240	0.6680161031375790		0.711	1.269	0.713
0.6282382190294510	1.1064929641562700	0.5914183788680950		0.6110321152899830	1.1091481641433300	0.5912026567328460		0.6722529555857500	1.2859835375837100	0.6508048149589730		0.69	1.246	0.693
0.6474641106290480	1.1957778130573100	0.6367858182327520		0.6465052385903940	1.1956960749543600	0.6285745967090450		0.6685528256682080	1.30580906878738	0.6475296738392280		0.695	1.285	0.506
0.5586416691017830	1.058960612176100	0.5403957496671750		0.6144560335197360	1.1419870218606200	0.5838960890032010		0.616236935152252	1.2448552641714300	0.5889197553694990		0.627	1.111	0.619
0.5371811519873070	1.008319216088350	0.522305081441888		0.4871400463834000	0.9722431016070710	0.4673504281802380		0.5639169361856790	1.1627903544662800	0.5348988428982340		0.572	1.056	0.411
0.5253893778620270	1.0478530600009800	0.502588852761021		0.5275149156988660	1.0563275158271200	0.5054496184637420		0.5681213540745940	1.240282209657810	0.549750369435433		0.557	1.072	0.413
0.6505210858701060	1.3174029049217000	0.6083686733087560		0.5531030710188700	1.1857265113884600	0.5195287821260860		0.5147947752024210	1.3402526987923200	0.4849917073477090		0.539	1.346	0.392
0.5322391157174250	1.1431399721526500	0.499871100121075		0.49183441873934	1.1303683757924900	0.4635583327206990		0.4403397879550750	1.2376884128478000	0.4135573350359480
0.3785642210991510	1.143821469908110	0.3428154953470810		0.3862747355384880	1.164500938613330	0.3479508621145210		0.3492083094786910	1.3262413237846000	0.3169788986019850		0.676	0.939	0.672
0.6301444445099220	1.244944679475700	0.5920873664216080		0.5130348437479190	1.1138354007557200	0.4748337081487350		0.5359619105973700	1.2661925171145400	0.5083904808874440		0.547	0.824	0.38
0.5980842928662290	1.2882483822677800	0.5512021343745500		0.5499213287558790	1.2410207206254500	0.5067422901837920		0.5532115924587740	1.4513149463209400	0.5286101135293620		0.586	0.992	0.491
0.6402646758831720	1.3215076605481700	0.5968000424398200		0.5090859746819520	1.19849062418288	0.4773271167478680		0.5562540056482860	1.4390853433941900	0.5294138527185200		0.6	1.017	0.57
0.5504005364632060	1.248711022035430	0.5168570482793670		0.4398880813060390	1.1427939196276600	0.4040922226610990		0.5035678876101710	1.382864434323800	0.4728695551402150		0.543	1.045	0.519
0.5273904859611860	1.1770572128358400	0.4986172382005470		0.4134317912104340	1.041957788236850	0.3842180985178930		0.5041974545600660	1.244979833443200	0.474206538332321		0.529	0.941	0.529
0.5635581224289740	1.2243793642263600	0.5282843391362660		0.3922183276601030	1.0476177023346800	0.3611490308294390		0.455478738467561	1.2711004720946700	0.4227483480815210		0.472	0.986	0.48
0.4668668349720670	1.06235712832801	0.4356767775008770		0.3659957300929570	0.9552519638226850	0.3382354587102530		0.4379675012193080	1.1749892505931900	0.4106265649453310		0.453	0.906	0.49
0.4232200325049210	1.067150929994490	0.3897426622273640		0.3599766882952230	0.9969773722140410	0.3301307277183020		0.4043827873269260	1.168715230536510	0.3777151222982940
0.3843449030782380	0.9693877284343340	0.3565504757263860		0.3513724935344520	0.9358834706254970	0.3243423586048200		0.380704073023603	1.0868665103440400	0.3578035804539880
0.4365407884867940	1.1177573867493700	0.4008796391126490		0.3278793446170900	0.9994504723135680	0.3000713728149760		0.3496204918276310	1.1691319171991600	0.3209246398174600
1.0516681801823800	1.680875605560230	1.0558709212352800		0.9117115284424520	1.469252092262410	0.9596347046623320		0.9558286278377060	1.5311801193047100	1.0126796819448300		0.991	1.333	1.039
1.027203924151690	1.7044867764425900	1.0143185293439500		0.9449340263686120	1.5993159160646800	0.9605272283062020		1.0060874043163700	1.8224863447450600	1.023378268063560		1.049	1.498	1.097
1.0118276601355100	1.7600426496996100	0.9902173211139480		0.94834456377412	1.6772627536183600	0.9417743731876170		1.018119293588250	1.9318979891576900	1.0236997305945400		1.081	1.606	0.796
0.9732149117928480	1.6048958149733900	0.940705588710483		0.8662701713880970	1.514021835947840	0.8353376753421090		0.8844660109626310	1.578550897169250	0.8911993426882650		0.846	1.531	0.872
0.9599542338105310	1.650355523115270	0.9247814400168200		0.7853706880322210	1.4590035940330500	0.7649593223343920		0.9107106670938030	1.7690700278168600	0.9052459247240460		0.892	1.587	0.57
1.0088786386318800	1.9183921795283400	0.9542658514376240		0.8365850994018530	1.6304789709944100	0.7986074909529320		0.9152508782486300	1.9436175142842100	0.8855366099719450		0.908	1.695	0.584
				0.7747598188877110	1.4268796758212200	0.7455416945894840		0.7827526587340950	1.5147274258487900	0.766247131125269		0.792	1.38	0.5
				0.7456260216595590	1.394213719248910	0.7322189247437220		0.8112375965043670	1.6058661403914800	0.7934788968779390		0.818	1.471	0.575
				0.7380641016500220	1.4000820690202600	0.7072250323687280		0.8271587454771230	1.6406083456752200	0.8132591716982530		0.827	1.557	0.583
0.7857434350955780	1.3726169739409700	0.7407566313253470		0.7386207814916960	1.339613462646100	0.7033840494265810		0.6921951357139110	1.4311993258950000	0.679607073385793		0.703	1.29	0.423
0.8072699283579560	1.3873448554839500	0.7764802014954600		0.6649823802186690	1.2744688199811900	0.6408259906941660		0.6990076533131700	1.4455379374257500	0.6826480439639240		0.699	1.302	0.437
0.7144541300486410	1.3811435496881800	0.6693151024856240		0.5914260581694680	1.2387462046325700	0.5623492109768630		0.7032966341731000	1.5548119016569000	0.6765706881066510		0.7	1.337	0.449
0.6833214630281700	1.3038474161150200	0.6355900139635480		0.6612368649168980	1.2691035576035500	0.6261871078849270		0.5913215838384930	1.3527838827333700	0.5695601703175270		0.608	1.255	0.372
0.6209431972449130	1.2271182370322000	0.5869016949611360		0.6140104351524070	1.2377461822938500	0.5842057572048580		0.6272507261425560	1.434845531021570	0.6060707166273690		0.626	1.297	0.47
0.5779730409677480	1.1577972461811400	0.5444265535741680		0.5705318465925150	1.2188133081417200	0.5370540532930480		0.5919186623582430	1.4247957185689100	0.5589796499151670		0.609	1.304	0.467
0.4530222515439640	0.9031326208976240	0.4339761602694960		0.4223701066409540	0.9081206353370200	0.401943533317771		0.4026643698202710	1.042009687678840	0.3841701478500200
0.384356224453407	0.9535512565618150	0.3674967309450710		0.3306759970726180	0.9069391753237160	0.3136111779725160		0.3468407954249290	1.171391704185790	0.3272530084583210		0.37	1.252	0.393
0.5450757866645860	1.0683956807676700	0.5221841523335570		0.4258384853553600	0.97292253490692	0.4040780230126950		0.4121346911216860	1.0875973579975800	0.3924045237877030		0.419	0.978	0.378
0.4689305421931090	0.7682269292510800	0.4495369047505620		0.4565237210012200	0.8332622628627620	0.441062485659041		0.4664067355212970	0.8967345357704970	0.4542999855214860		0.476	0.881	0.462
0.529130448374049	0.8045394088723780	0.5255995351695140		0.4852507476954700	0.8132403942164670	0.4777861464007400		0.5184992076902570	0.8850237630907030	0.50450107033233		0.519	0.88	0.488
0.5535908651464660	0.8817182503425690	0.5466357666631590		0.5389674692076930	0.9180404526985160	0.5257797176311010		0.5272330739560520	0.9518083734131780	0.5164406958770570		0.511	0.907	0.46
0.4893844297641800	0.7855973886678980	0.4844072197555240		0.5094717815975050	0.848528755600086	0.4972170203784190		0.5175779276975220	0.9091838449990060	0.5076795763036630		0.511	0.821	0.486
0.3916966927163880	0.7255204931092700	0.381534672836974		0.427042741114024	0.8138525990388560	0.41358010918639		0.456444019803539	0.9179480680943240	0.4464585335265480		0.466	0.829	0.483
0.4688556191479070	0.8546931178868450	0.4559671021946910		0.3188073183700190	0.7392233901801270	0.2995364377808370		0.407306592950906	0.9309279778244220	0.3955592567889520		0.409	0.808	0.478
0.4648556120141820	0.7603948851266150	0.4448231401734340		0.3747604971141090	0.6989494284177930	0.364930514172513		0.4381513441328540	0.8257190065191710	0.4237677853711000		0.444	0.757	0.522
0.4126952048987210	0.7206248171385380	0.4001529287265030		0.4104858306503740	0.7133625273007380	0.3962139075004880		0.4250074328125670	0.781902737406017	0.4146076699306980		0.424	0.722	0.461
0.3629093002594750	0.682291968885896	0.3550028510586830		0.3725831390287760	0.714149833613034	0.3612964366199020		0.3939530816601910	0.7738786990003520	0.3806425122734070		0.396	0.724	0.477
0.2830877038227810	0.581866104109569	0.2753104651258710		0.3791035333605370	0.7371797770301000	0.3673983932651210		0.3926002414559910	0.767562428908127	0.3798601364739950		0.4	0.746	0.465
				0.3911622803514870	0.6635021109904770	0.3869075858029500		0.3912815395461340	0.7140405647186530	0.3842773052214330		0.392	0.65	0.496
				0.4002174607799770	0.6950628215785560	0.3953434297515770		0.3898714484330090	0.73766378747016	0.3811563298433610		0.384	0.663	0.461
				0.3906115822563150	0.7058077940019630	0.381969079652289		0.361277814636775	0.7067367107817520	0.3534186865632110		0.352	0.648	0.453
				0.3650585712253060	0.5837597083922690	0.3616203940201240		0.3460047677553910	0.6065507901439100	0.3412832609483890		0.354	0.557	0.467
0.9732981007211220	1.4664106674648500	0.9676258545991280		0.9039999443699000	1.4000021219163700	0.8958032340640360		0.9004762949655170	1.4797373778404600	0.8958613331527190		0.864	1.209	0.896
0.937292217954778	1.4537151822715600	0.9283620975078720		0.9112560349732650	1.4661358930636600	0.9008260928075250		0.9432641020258860	1.6133266570947400	0.9427594930853920		0.931	1.324	0.955
1.008404345967690	1.520716909651190	0.9996325320387840		0.8870512468984580	1.4017280302077700	0.8976614137434450		1.0116521419959	1.6506693247331700	1.0078288255136900		0.98	1.344	1.015
0.8094330662075670	1.2421879476567000	0.8036235691994800		0.7859309893255150	1.2347427875121300	0.7775630187351800		0.7775086955398610	1.3270774760059100	0.7664264449368360		0.723	0.695	0.58
0.8558541987610610	1.3094624415269800	0.8485172531784120		0.779875573893208	1.2305475666392600	0.7693532128871060		0.8318459951443190	1.423993993807240	0.8062955062764600		0.85	0.766	0.853
0.770715086256396	1.246721936316750	0.7677423341339650		0.8049623422744670	1.2934832238044900	0.7945694801267290		0.8775308016007800	1.5142564075114000	0.873038204986704		0.89	0.825	0.769
0.7598011517752890	1.2636832664153000	0.7351131409155560		0.7651879054314060	1.3085620851569200	0.7423870434984550		0.73492470521933	1.4270501649559000	0.7202687993451770		0.959	0.314	1.017
0.6506383423885440	1.103790130561670	0.639383699629595		0.7011301732808160	1.2113018707834200	0.6844975238662650		0.7963509393718330	1.4509156851372600	0.7817571295903480		1.053	0.396	1.103
0.7467587759729020	1.2440964990235200	0.7366417661795430		0.6918128919730840	1.201566230134200	0.6751280879621070		0.7706371830502200	1.499163079149890	0.7476059136239860		1.043	0.432	1.093
0.6753301188724420	1.1859626352525800	0.6545044480388350		0.6521725919967700	1.2201334497819100	0.6240474071112190		0.6013421819358610	1.2961123232704500	0.5796062000644000
0.5835449053701030	1.0596335133053400	0.5654624666154430		0.5906475058864370	1.1290695122150100	0.5664505128724270		0.5883397710967430	1.2663476626404000	0.5671810724359080
0.477651193980682	0.9739914056703070	0.4613858001477250		0.5471409444883860	1.081627672329900	0.5222022557053050		0.588730061198063	1.299315406003050	0.5685921430780760
0.5342415384913790	1.0003596473966000	0.5166580794396500		0.5521132495423200	1.114763926702790	0.5284081754451690		0.4639363614995660	1.1534992949057800	0.442619171180538		0.837	0.373	0.865
0.396596688348775	0.8654536277232990	0.3792434121486000		0.4631438249976310	1.0312639526233600	0.4399210966408090		0.4738816887599140	1.1928096837218400	0.455127657007875		0.84	0.433	0.886
0.4433988106697790	0.9764114411452730	0.4273236645310300		0.398473396984993	1.0016461692846200	0.372315336934298		0.4799817750541000	1.3601881101478300	0.4588307032038450
0.4654637904242800	1.1368504032598700	0.4314045967197970		0.4325995659481670	1.1430607272229300	0.3968682526974080		0.4080050147864270	1.32121966956272	0.3736586080785030
0.4129042343403690	0.9920447172542080	0.3933241164605890		0.4286223182443710	1.038543029499600	0.3984352936102830		0.3749270906170330	1.2232648018942700	0.3520284447849840		0.372	0.93	0.267
0.287101484272238	0.9320970944905290	0.2606884697656620		0.3111704937795660	0.9715450841010470	0.2854187987257800		0.2683171131934420	1.1763277539270300	0.2453910190647760		0.286	0.98	0.208
0.4521177412632380	1.0964012551807100	0.4211391985632560		0.4322254338441600	1.0754144967339700	0.4011262438792270		0.4025227245304600	1.262594414595740	0.3734400085062020		0.36	1.016	0.203
0.4578884536572940	1.0552038753985800	0.425297005979777		0.4403595444511670	1.047763132268620	0.4073283092343360		0.4643382703760410	1.304137648537520	0.4300334451843980		0.449	1.08	0.325
0.3677529094734530	0.933115206631153	0.3343093129327830		0.3903696646655490	1.0022938057974100	0.3582044608650010		0.3967077601412690	1.207352045156310	0.3673926257600790		0.392	1.043	0.275
1.0386256372439900	1.8890072524027600	0.9925628828764720		1.0093673246434800	1.9393323919968300	0.9629312789251930		0.9521260339949680	2.0392149587798300	0.9091150397642420		0.956	1.82	0.965
1.0389833122370700	1.95795526539697	0.9729990933748790		0.9537955991898170	1.8887522349389400	0.885796743971012		0.9013285835120660	1.9972497268831100	0.851988748445181		0.904	1.842	0.885
0.8481400382489930	1.6191650615270200	0.8135854911983120		0.8547720175179590	1.7176157238510100	0.8122785283215470		0.8908396339872070	1.9377627466529500	0.8478475120432840		0.876	1.756	0.581
0.89966901133321	1.6754295724052300	0.8504031158032620		0.8506491188936110	1.6876136222389400	0.7967368162835090		0.8060656300739470	1.838681719432540	0.7602180119661830		0.776	1.711	0.769
0.8186676128029820	1.6084886703762600	0.7778398620662760		0.7987316696344490	1.6426573376296000	0.7526520033586760		0.8225380580669450	1.8609516491303800	0.7826100325240640		0.793	1.695	0.782
0.7723042188499000	1.576564385477980	0.7272369123524450		0.524741553863857	1.295952789159590	0.4653160628703010		0.7703205260811110	1.796211397363870	0.7262323104335750		0.765	1.711	0.455
0.7998717689478850	1.4995040809061100	0.7473186360931230		0.815467794806426	1.581046042926400	0.7552910122579870		0.7555604027706630	1.717669413217890	0.7052343642226290		0.743	1.675	0.733
0.7387528069985820	1.4655920734589600	0.7002545662117160		0.7401489819436	1.4786416548225800	0.6972508098421730		0.7324045508739070	1.647671589964990	0.6972169209709660		0.7	1.613	0.442
0.7483470124073040	1.4606648512323200	0.7029958981521070		0.6884621592643880	1.4585076650089900	0.637645776105747		0.6839170932206980	1.6759320743895600	0.6449057632286850		0.648	1.625	0.402
0.7110843067425440	1.3717865627089500	0.6791443961100240		0.8151236932277470	1.5485128063773500	0.7685635375265880		0.7120096043446050	1.611367636036450	0.6811740731448610		0.717	1.422	0.701
0.6201394747791160	1.2900580048144300	0.5848320014547000		0.553679330136411	1.287769936680610	0.5053856286651820		0.598578719830846	1.5311215275557500	0.5655269535041630		0.593	1.388	0.39
0.6321723905081620	1.332068352108010	0.594991182089342		0.597524523248512	1.3070119713057100	0.5546876510288650		0.5804147151176850	1.4997867716486300	0.5479551883480580		0.567	1.354	0.294
0.5070614024017890	1.1303147429719400	0.4759002290745370		0.5677654416953730	1.2887838349755400	0.5273041166155550		0.4902578466976610	1.3546847775444800	0.4574090359852520		0.504	1.264	0.287
0.4522053040422140	0.9711179791609420	0.4270211298992170		0.3829916990863060	0.9331820036136160	0.3547078915205930		0.4404374173005350	1.21276276380554	0.4197349064552650		0.443	1.094	0.385
0.3920584234664990	0.9782936663953000	0.3667226558136400		0.3533139452898610	0.9743547767274070	0.321798099260327		0.3903432654811480	1.2149714749090700	0.364997161051911		0.401	1.133	0.311
0.5305879137889290	0.9296563153760630	0.5191907691865690		0.5081011650143360	0.9448324914800560	0.4900335912444190		0.515364583866939	1.0818326178056400	0.4972817949313050		0.517	1.029	0.431
0.5385226931824510	0.9198977244510470	0.5229127767762510		0.4476760334355500	0.8690997956917170	0.4288982292312610		0.4713351209948810	0.9756744447660370	0.4528870285948840		0.429	0.709	0.428
0.4214793634038250	0.7993170667228820	0.4070243008393100		0.4040595579304750	0.8512566472149660	0.3823253183595930		0.3913797952724200	0.8960649480220350	0.3758395629527060		0.388	0.636	0.366
0.427723798903295	0.8347067633373950	0.4145772755310650		0.3806853419256910	0.8308866704863050	0.3625311424057860		0.3642859935945460	0.8907816587100120	0.34509918027083		0.492	0.607	0.482
0.2185353879254530	0.6723452146857190	0.2078049080706570		0.2188177219422440	0.6953958544368660	0.2038517106722480		0.2414328558585140	0.8379412671450160	0.2282924775634680		0.37	0.767	0.352
0.4664942894874340	0.8695210758283560	0.4500202283789200		0.4842428237079480	0.900768933822058	0.4684594998256160		0.4558230127640690	0.9478472872815930	0.4393524492794550		0.412	0.791	0.437
0.5105258070628150	0.9198574176763980	0.4947259682822560		0.450004061182341	0.8827261124993070	0.4276107379454990		0.4669481039807410	0.9119401169965610	0.4488809385777980		0.427	0.782	0.374
0.470059554589319	0.8080501629868280	0.4565367514910510		0.4086990925490490	0.766329231188456	0.3944556386475030		0.4079453392155200	0.7888952540883110	0.3945891486796400		0.38	0.614	0.399
0.3209788774869190	0.649499672000609	0.3092973136227500		0.2718703614966060	0.6404732252133850	0.2588574386175440		0.3701510100108190	0.7924536904499290	0.3588093169323680		0.315	0.335	0.393
0.2603826799091530	0.6561965391778650	0.2460219232444040		0.2104897737608450	0.5861323598936860	0.1963678764285070		0.2860039266995650	0.6581453020912020	0.2720828090490910		0.452	0.554	0.443
0.2950320930486400	0.647847846523194	0.268711160930038		0.2075213634331380	0.5889324387384730	0.1908821491272790		0.3034033047718180	0.7029197217449340	0.2842408139816470		0.474	0.452	0.467
0.2610556427945390	0.5345960467346540	0.251329127814936		0.2098174001233950	0.480519999012673	0.1909093074997700		0.2887494312138220	0.5690120788297920	0.2715923323779960		0.507	0.477	0.503
1.0776332592033500	1.517819143829000	1.103840528329330		1.0242669184812400	1.4219090543993300	1.0608105932709000		1.0089292637598500	1.4671458537518400	1.0789350771121200		1.002	1.405	1.09
1.039031353626350	1.4961211625587700	1.0629502318775900		1.0316794931993300	1.4341981650101700	1.0632149569724800		1.034986885999920	1.5038392199522400	1.086026942509700		1.033	1.373	1.121
1.09993682379086	1.5790472607646300	1.132215691465830						1.0654513776940700	1.6287009365317300	1.0990151739709100		1.043	1.402	1.12
1.0262761989481800	1.3891017765272800	1.0579673791669100		0.9667330736555960	1.3522920115313700	0.9755223294960700		0.931650926490628	1.3771570359986300	0.9622439537548680		0.911	1.314	0.981
1.0346262451269700	1.3757644174958700	1.0713310085935700		0.9676938666027370	1.3398706562053600	1.006682707258780		0.9826489416858610	1.3982497289191100	1.0336650302610300		0.975	1.359	1.06
1.0288869790669100	1.5323477679235500	1.0343654989650700		0.8466052976886010	1.3363086151377000	0.8504637567635560		0.9418864882410700	1.5752037129133000	0.96079038963178		0.96	1.538	0.753
0.8243432436762130	1.2208914204879800	0.8224290084873990		0.805325250088105	1.302910506926050	0.7893397831012720		0.768954701044707	1.365947616644670	0.7615740911613900		0.756	1.262	0.583
0.646955740184159	1.0116751670542900	0.6392869820848400		0.6633959948449240	1.135869047205910	0.654588577147298		0.6818389916486330	1.1979629979828100	0.6771821534498350		0.673	1.169	0.59
0.7587117309479830	1.1830822765095400	0.751360905859339		0.6813200753292210	1.1964367135611500	0.6639264069606950		0.7415894505028890	1.3661344493488500	0.7306456960358280		0.722	1.302	0.594
0.6395618071187370	1.0645255472465400	0.6248978997417970		0.6118276905012360	1.088584562163550	0.5925537919024430		0.6117112796367960	1.1684235789246300	0.5939887082839020		0.581	1.044	0.461
0.5952515130690530	1.1180803139855400	0.5757599039892120		0.5491587783004130	1.116594446376770	0.5244025419607060		0.5853473499865140	1.2517353095912100	0.5633272659832390		0.56	1.132	0.437
0.4947064898719360	0.9658509882617900	0.4776973049924420		0.4723743338500240	1.0296631114533500	0.4484634700705720		0.5428882514284670	1.1939318558804000	0.5214166867742470		0.517	1.06	0.445
0.5059014298886360	1.007380773231280	0.4912369979820370		0.5101857491217880	1.0083363110905800	0.489305812399801		0.4751450981375010	1.1392007693987400	0.4524747242385490		0.424	0.75	0.349
0.4749926773654940	0.9477353505011730	0.4579888184120870		0.4385967880554560	0.9098570951788670	0.4164100376837870		0.4280799613096650	1.0341076693904800	0.406485716986714
0.3422208290121040	0.8318621049058030	0.3213790911516910		0.2845416454110510	0.7583061050059820	0.2658488572492540		0.2614055165914040	0.8369395136345700	0.2421880567450010		0.52	0.449	0.513
0.557302412660439	0.9262714395325150	0.5535681877076090		0.5446410638806060	0.89380295153357	0.5373760287908990		0.5329723769164010	0.9331179425179920	0.5175860620642210		0.577	0.942	0.436
0.6446078582791500	1.016342973700990	0.638634376516625		0.4978590137772600	0.8404723880436290	0.4918577214937440		0.529603048646172	0.9308620679301610	0.5217725683390130		0.555	0.968	0.463
0.4521253692770750	0.8938068507302860	0.4330026829196370		0.4929042720315350	0.918287681433524	0.4762409596629810		0.4872067714971420	1.0341838484992000	0.4675725387823250		0.488	0.993	0.436
0.501054845107674	0.9071390005219390	0.4808171678000180		0.4619554022170340	0.8271364821167970	0.4482168146355520		0.4270710694631380	0.9198380196220340	0.414737257495767		0.425	0.871	0.411
0.331862541106037	0.6383270424746840	0.3202601950312140		0.2888949075845520	0.574866260075891	0.2802939635218410		0.2711746488712620	0.5867206061659550	0.260081121934967		0.282	0.632	0.329
0.9219349040527540	1.4773309791082500	0.8897506460328740		0.939502772479099	1.5533475315993400	0.9177862260493520		0.9343874423720370	1.6041534963268500	0.9373442051011210		0.961	1.481	1.002
0.902175835069664	1.469507596884480	0.907223290464356		1.007518077382040	1.6045813324688900	0.9894327171169150		1.0243158655768600	1.6695172684185100	1.0350447171862100		1.021	1.566	1.075
0.9612830235496210	1.488330302506390	0.9868269760431800		0.9783067923849540	1.5298955113911600	0.974744875419278		1.0297906523860500	1.631161873274210	1.0289790515421400		1.029	1.54	1.09
0.8688990722049020	1.3811180901335200	0.8464222398043610		0.9060680436568960	1.4899412251760400	0.8718648111768810		0.8427365929966940	1.4810686091253300	0.8342726411081510		0.815	1.302	0.831
0.8933981337237980	1.3912617814954900	0.8868455092779880		0.864210016105068	1.3899022387882800	0.8608204653153810		0.888255059599464	1.4958830091110300	0.8919284539916300		0.865	1.271	0.892
0.9415310485114790	1.4824140042432200	0.9370415112739600		0.9088565041984980	1.4978057314388700	0.8880466628348190		0.9212429342648490	1.610036844416250	0.9223259777862060		0.898	1.332	0.921
0.6768717047758730	1.1155994755420000	0.6746773653884260		0.7163620873609040	1.1743117044139500	0.6958166567596800		0.6595635072684400	1.2012456602454200	0.6379470565827550		0.625	1.005	0.465
0.6506612651652360	1.129608487047110	0.6396626572115460		0.6718539395533490	1.1506002107652400	0.6481337715088430		0.6868851608889130	1.3034727177618600	0.6687570732063220		0.643	1.029	0.486
0.6652638871627910	1.2087875070651100	0.6512498475096560		0.6341391607771580	1.1663208432684700	0.6086534453560280		0.6817118655987760	1.3760667366899500	0.6626455517638610		0.645	1.065	0.494
0.5736068291269100	1.063543058479840	0.5574476204502290		0.5832703178161730	1.072000063866070	0.5585181581204600		0.528968905191071	1.1433967088052900	0.512921058480603		0.495	0.944	0.369
0.5827168434197990	1.057190643997350	0.5586671951089480		0.5260617533714260	0.9765356033511250	0.5026611951007010		0.517241828372971	1.1128894307526900	0.4947645990191070		0.49	0.921	0.418
0.562510090071842	1.0762541808685600	0.538335268336495		0.4903266013453620	0.9961572780303200	0.4582490699580530		0.5216806110657150	1.2037678829253100	0.4948772729074660		0.497	0.983	0.415
0.4778685544374550	1.0178269260623300	0.4549075458731990		0.4585970666244620	0.9608188020312690	0.4393279614307590		0.4515956181082660	1.1261016060097100	0.4269030188696520		0.438	0.934	0.296
0.4502611778132450	0.9956152047392950	0.4117791145115900		0.4016334719319440	0.8866882408641470	0.3793186005164780		0.3731962313607890	1.0875789799769600	0.3522742139950090		0.362	0.891	0.24
0.3678510878455710	1.02276796146168	0.3462588430887370		0.3151799265526140	0.890801016992008	0.2917590737161600		0.3155650854540960	1.0919215568761500	0.2968951620282250		0.267	0.812	0.207
0.3644467186593050	0.9843295433992790	0.341110156513067		0.296136597515413	0.7888031126023840	0.2778367254135960		0.2644811827458940	0.932274681378044	0.2439037803514840		0.356	0.763	0.332
0.5399810308697040	1.0484299648954300	0.5043310234903000		0.4997127551637850	0.973409596818463	0.4669219596273020		0.4666967098470150	1.0668267944470200	0.4418753901033230		0.442	0.716	0.286
0.5155984373626350	0.9710618052570000	0.4896272803778790		0.4477812567539750	0.8884182457500720	0.4325689312520360		0.4715723972074560	1.0427074530922300	0.4517184756090320		0.475	0.67	0.382
0.5030816920812100	0.926832642158748	0.4749294108866160		0.4201837395890390	0.8298078416231930	0.4034567543323530		0.4489938802626980	0.974402265061849	0.4290283007777160		0.484	0.663	0.412
0.5886322617017070	1.08626570710139	0.5633983318482820		0.4332236585080440	0.8767028334209800	0.4146615742831730		0.4758430452583570	1.0191989351980700	0.461881383186753		0.509	0.69	0.427
0.4972475901210430	0.9403498474437400	0.474118964303211		0.4206860343862990	0.8577962826301010	0.4059358590575210		0.4555670888362020	0.9692604911310810	0.4370591948905070		0.466	0.646	0.408
0.449852154955793	0.9160595911833700	0.426299699019489		0.3565809692250470	0.7885843000361430	0.3379932973991830		0.4224324867088350	0.9675687802499620	0.4057774861474030		0.442	0.632	0.415
0.4495187142471330	0.8804082768747060	0.4226188174155560		0.3448056072662250	0.7518671412827050	0.3193288768183120		0.3822024070554680	0.9010555626179890	0.3660465846814650		0.447	0.591	0.429
0.4617022822819500	0.8970332641736640	0.4395481771969690		0.3192931075378600	0.7288139090150610	0.3014107059878410		0.3829369227609970	0.8628435924511220	0.3657872367605920		0.364	0.57	0.359
0.3885047099479380	0.8287208472088140	0.3768029621142230		0.3524934907769640	0.7550193876625020	0.3408637295284280		0.3809453340071730	0.8363936272122830	0.3642863220947070		0.387	0.539	0.418
0.4319866415826320	0.8457146350475680	0.4170597580855620		0.3227475389872180	0.6742620242314010	0.3065722730402160		0.3557056165857290	0.7649525882795620	0.345045579729177		0.378	0.517	0.441
0.3907292712460780	0.8235484376674120	0.4086527581331430		0.2621566367134230	0.599426998024811	0.2423458756224510		0.3349963770443650	0.7271148378462390	0.3241619073225610		0.344	0.501	0.385
0.6751848382374710	1.1953288863236000	0.8729406100330650		0.8413064515031290	1.2195905631267400	0.8910949065019760		0.7937801388928150	1.1044464890941100	0.8597201645462850		0.812	1.265	0.862
0.8144070080120700	1.127629000069030	0.8844089326854080		0.85501700500482	1.1104314410478600	0.9199027091673360		0.8589616007449000	1.1562912936718000	0.932980876164856		0.859	1.29	0.935
0.8829333544965870	1.3151407510612000	0.9169254907865240		0.7866803494364140	1.1306067779504700	0.8323696830445980		0.8688338456723700	1.3830320442021500	0.9074378083604620		0.873	1.327	0.932
0.7866337865091250	1.255697427755630	0.7767290031609490		0.8229832791669500	1.2952301879298600	0.8114434781287830		0.7767725447017190	1.2508418307442300	0.7657683666131970		0.745	1.161	0.769
0.8897131163279970	1.4498967178743500	0.8733116368788820		0.8480803311062490	1.3871533785511900	0.8292550369990890		0.8572955516768780	1.4443143042950200	0.8581831121419350		0.837	1.306	0.871
0.7856274556914690	1.304075960109590	0.7785171737000780		0.751608619246361	1.2463389613477100	0.7408693048286400		0.8041166102127100	1.355161161489310	0.7967381940013230		0.781	1.195	0.805
0.7337583095233940	1.2407588456836800	0.7210227374963640		0.7377836928973220	1.161408753919700	0.6991311398458410		0.6968078491288550	1.206149801355760	0.6635283833889730		0.678	1.025	0.684
0.6837913577905870	1.1763278239664200	0.6625452649904730		0.6731207050725970	1.115565583773910	0.6590824285977340		0.7196681504095200	1.260567388308980	0.7054056246285500		0.699	1.045	0.71
0.7170963156087370	1.2075769871514400	0.700038562232778		0.7103114200643110	1.1275401490905300	0.6951496828439660		0.7470324584166730	1.2899748196918800	0.7371479095174170		0.738	1.062	0.754
0.5986266488754160	1.121115355249390	0.5673430152101610		0.6116531803896220	1.09991440254597	0.5853507242798150		0.5993266504239320	1.211811500860970	0.5719326463985450		0.643	1.201	0.645
0.6554982847988330	1.2036421126721100	0.6339771311052520		0.5996788120140320	1.083324964616860	0.5760216191377040		0.6237220773120670	1.2570584288289000	0.6044662733547020		0.626	1.302	0.482
0.6149263253673260	1.187271711873300	0.6008454931717950		0.5615639660455210	1.052180528954700	0.5414452275078260		0.6146016465000300	1.248061092848780	0.5930497452468530		0.546	1.269	0.37
0.5628745614756770	1.068783908318120	0.5305539322105560		0.548837062673796	1.0068797035695100	0.5254232301047430		0.5056562414283720	1.134322330303800	0.4809160014601590		0.49	0.923	0.337
0.5372321882234970	1.0627143449726100	0.5136342425262700		0.5075034959283640	0.9671317226844920	0.4817178598019310		0.5109351625563170	1.1959868856948100	0.4895604472853750		0.492	0.962	0.344
0.5022522362801700	1.068206494015850	0.4792144193980880		0.4332089274927870	0.8680242864921010	0.4124105378085160		0.4884045324012960	1.169553545859000	0.4622156005750340		0.44	0.905	0.321
0.4976310236723320	1.0658884569821200	0.4500529947789420		0.3977900200847660	0.9922565281547480	0.3739147183755290		0.4215176683436460	1.1482133020040700	0.4034442163950950		0.389	0.908	0.468
0.4119495904726230	1.0310888471777400	0.3890194123354090		0.363861264609685	0.9518824287237390	0.3450018312697160		0.3758911829233620	1.21249197778443	0.3569029107577250
0.3477768267768430	0.9903784479710050	0.3180184750943920		0.2548901162253110	0.8817679628088200	0.2364418402967120		0.2631276467196100	1.070469970636510	0.2472069709662320		0.534	0.659	0.539
0.1786495575322290	0.7681945863559650	0.1658742277764620		0.1564309221593270	0.7691827221074750	0.1440433607037470		0.1577759085922690	0.9513915359406610	0.1469069772114230		0.516	0.575	0.512
0.5362141269106080	1.0448942279855100	0.5223267492022730		0.5114978624209420	1.0469758428627300	0.4895130702511890		0.5173913356175830	1.190173521188560	0.4965689158265510		0.411	1.072	0.352
0.507471860505058	1.027768488657900	0.493423604805285		0.3641313528390280	0.9023550776939380	0.3418394963463580		0.5061630702614830	1.276702082210270	0.4831066551796230		0.411	0.958	0.426
0.4650052546075970	1.0058543413487600	0.4484494171945170		0.4142654180352600	0.992909798614871	0.394557198460236		0.453963268717716	1.223618107237120	0.4335906307573070		0.391	0.935	0.475
0.3675271056498810	0.9094842763336400	0.3423086762452460		0.3043115104375090	0.8891480250712440	0.2816513020317500		0.3798114795823940	1.1772461223565400	0.3573519546699280		0.394	0.862	0.207
0.3077711493018360	0.802633351059633	0.2881173185593890		0.2751432741836620	0.7645266979103220	0.259350528785608		0.3372471710884380	0.9958245394037480	0.3226232154595780		0.43	0.732	0.408
0.3609366121719340	0.9759990747473520	0.3419387431446980		0.2915370691853590	0.8943863899634400	0.2713589959324070		0.3339309039077590	1.1020013592469700	0.3136574975860620		0.393	0.52	0.48
								1.031709801688830	1.7763641766642400	1.049202930936510		1.006	1.767	1.088
								1.0346452561161800	1.8349478440645700	1.0401983427949700		0.995	1.717	1.066
								0.9849162514292310	1.7134446893141600	0.9904802437577230		0.971	1.539	1.041
0.9010663340105820	1.3776100804659400	0.8999173769496970		0.8416395282701730	1.3319819550180900	0.8418549828208550		0.9002661152287380	1.531391252347950	0.9140876797006600		0.832	1.069	0.85
0.8973917690245670	1.3590752670498300	0.9134648192320450		0.8771993143906400	1.4310520332599300	0.8947952873890650		0.916523942896304	1.5806272709296800	0.9189674998651070		0.864	1.014	0.711
0.8759703894166820	1.3603060176023200	0.8912492757585000		0.8033360124376080	1.3228412778287700	0.8110352494622330		0.9022347846443420	1.6011958568583400	0.900837185312416		0.898	0.954	0.763
0.7982615410232020	1.3064121014526500	0.8205710382837120		0.7658014614957880	1.2987253254957800	0.7667439906943240		0.8102504677543100	1.4486193334830200	0.803288381923465		0.799	1.268	0.615
0.6800760661675580	1.1511285250681100	0.7033048623486950		0.695201642379122	1.1951693288437300	0.6995581769297240		0.7823624426855850	1.3936818230779000	0.7819368085658120		0.759	1.237	0.618
0.7947943168704000	1.30879823434352	0.7893718647962460		0.7269160828582280	1.2972449195425300	0.7171413839506120		0.7854652348908680	1.491761008915360	0.7742718386646590		0.768	1.294	0.605
0.6189886314238110	1.0846453573641100	0.6175628270407370		0.6839160371446390	1.191881129676010	0.6669066604490720		0.6713360152849620	1.2982843174647100	0.6586482789995670		0.617	1.133	0.508
0.625649567125662	1.1295458727367900	0.6088732354389030		0.5997000168314240	1.128064058162130	0.5790022085684240		0.6144555189857200	1.2890561203370200	0.5981668693215840		0.556	1.053	0.526
0.6747564775812530	1.1592156437579100	0.6538428075072040		0.5352171870297880	1.0603554637538600	0.5130971512796330		0.5978298591638050	1.2507372722961200	0.5782955788252390		0.565	1.048	0.499
0.6515339114028920	1.2919687235822500	0.6393180276426270		0.581181299847744	1.1709541294642400	0.5635741309839730		0.5415790825896060	1.2130813019334900	0.5174672186642730		0.588	1.062	0.567
0.4949066685649460	1.1215563241569600	0.4641273148008740		0.4316953233085470	1.021875504435660	0.4059661582000310		0.4850054642077060	1.2428745354555300	0.4634017179671820		0.449	0.99	0.494
0.5241307396627720	1.1214065054403600	0.4989817952529510		0.4223837815211100	1.0063360405930700	0.3984298432866070		0.4680141987025130	1.2255517294756100	0.4458205611553220		0.444	0.962	0.507
0.7102578967146800	1.302374639074050	0.6844744986139590		0.6869278694674810	1.3273334498761400	0.6525264803637320		0.620259846314173	1.478080765700680	0.592782930229826		0.556	0.968	0.419
0.6676769316861440	1.2757191554262700	0.6361488156708500		0.6903585082704150	1.3513613072346400	0.6522005468545530		0.5876909803577990	1.53614425797507	0.5603058366865140		0.498	0.935	0.397
0.490340065520392	1.101862317124110	0.458856954494109		0.4901533520078860	1.1220611559688500	0.4613860878272540		0.5068670554305130	1.4260847577274300	0.4762629367611970		0.482	1.237	0.405
0.5023000043775680	1.116812203839620	0.4770927293199210		0.460426819833631	1.089283205219520	0.430155606002072		0.4351257247937990	1.3193078506053100	0.4067867936228100		0.427	1.232	0.387
0.3409624986809360	0.982696325975841	0.3155801555980360		0.3021986964239550	0.946227978565174	0.2784828586078330		0.3249310417360210	1.2067139535687400	0.3011687639397030
0.7087017452357180	1.2054184984751100	0.6871030192014200		0.7309274323127060	1.2525061670738700	0.7082221760783920		0.6408332816461650	1.294283535182380	0.6246583942880760		0.632	1.005	0.516
0.7027701412646350	1.1773134005594200	0.6936695849461990		0.6946867808451710	1.2199857124545800	0.6701018866020460		0.6621738780985240	1.3313781219787400	0.6406152565778190		0.669	1.044	0.5
0.6728373227012850	1.1349277365018100	0.662871968220163		0.6570566459739480	1.155626371157310	0.6339289211879450		0.6529315835517310	1.322422403703310	0.633735660885427		0.654	0.979	0.532
0.6784194996299230	1.186597414908090	0.6658094107769430		0.5939827806372720	1.1055065575306500	0.5721753415744030		0.6196661009768060	1.3088402284346800	0.5973765774048000		0.634	0.978	0.505
0.5804806529569400	1.0901790533598700	0.5705841062083240		0.567237746907268	1.0906681805261300	0.5454584220802130		0.5876229167082060	1.306586595855860	0.5700425307763680		0.591	0.973	0.475
0.5005969736513430	0.9641128688453290	0.484292864482451		0.5020594021442890	1.0195103062045700	0.4765035874794170		0.5543337568770570	1.256180668036340	0.5344329672896530		0.562	1.012	0.482
0.5634554469989310	1.0463984128372500	0.5344391406972290		0.5351180356825000	1.0727104151215900	0.5082350492936410		0.5440332721974170	1.252417209412830	0.5195557795507610		0.531	1.001	0.472
0.5627543498752230	1.0554957645860400	0.5379809443094150		0.477739608934036	1.0168452099093100	0.4542724981879080		0.5065879142338700	1.2429670896480500	0.4840238151591030		0.49	0.946	0.441
0.479537965459035	0.8825640317114040	0.4658477061468080		0.4300701118864380	0.9378391026523930	0.4075818218352380		0.4675164505360180	1.119306668249940	0.4503698406370460		0.464	0.882	0.44
0.4726047490882960	0.8994003620728860	0.4518127515440400		0.4140481616377830	0.931495170960349	0.3941557216700230		0.3989753162157330	1.0516853632498200	0.378883296639765		0.391	0.8	0.409
0.3979286283850240	0.8568353497643000	0.3839207759645760		0.4375483175858690	0.8859900814217880	0.4196368835952430		0.363356850413344	0.9336042451071310	0.346747729296587		0.33	0.304	0.392
0.3990653701452210	0.7529652801989790	0.3879273374868350		0.3371400485443680	0.7708730568036940	0.3190840968354210		0.3324259798694910	0.8477032585715730	0.3163916107555990		0.44	0.69	0.424
1.121353862573580	1.7757993430754800	1.0946428834256800		1.0682907095070600	1.7289697356980300	1.0492720430202300		1.039801487106160	1.842618411456620	1.0457673664671200		1.06	1.627	1.118
1.1035338835220300	1.7862458905808200	1.0887226681361700		1.06218721294421	1.7823277925588200	1.052396693644490		1.1123870441001200	2.018345496512710	1.11352257404298		1.123	1.735	1.175
1.205020887470870	1.991518330736810	1.1737047132882900		1.0305521213564000	1.7869741409565900	0.9990080689979750		1.083098963490770	2.0187298032607700	1.0795874571343500		1.079	1.733	1.107
1.0289402440329700	1.6025168917580700	1.003234032840390		0.9948632083766200	1.6091560424692000	0.9794111442111190		0.991611893332644	1.79813230975044	0.9859746926636830		0.966	1.44	0.997
1.0551423692975700	1.6465509770215200	1.046634853417450		0.9618582475724400	1.5714823198172600	0.9578459635222530		1.0274599652063000	1.8127794678771600	1.0296812423753700		0.991	1.425	1.027
0.9676494799810060	1.6252918879937900	0.9449361930862130		0.9661868713134470	1.648783585811270	0.9434736291399090		1.006531020170910	1.902121793525340	0.9933924844770010		0.99	1.479	1.009
0.9436628384874950	1.5539095186509600	0.935877355033488		0.9883146006207850	1.684575296506040	0.9610629526037980		0.9334018596627660	1.7569023044583700	0.9312420363302990		0.953	1.575	0.974
0.9418938775118880	1.530370809183190	0.914291323014427		0.9529342341294790	1.615127647915420	0.9307606938329180		0.9232737102888020	1.817318299591190	0.8998392939688210		0.913	1.477	0.934
0.928955820987691	1.512944251589760	0.9040304354372210		0.8879068851843690	1.5492630874326200	0.8612781048589600		0.9090428080300730	1.7691100171059800	0.8921936733057380		0.904	1.468	0.704
0.8156346321846890	1.440266413409830	0.7822947773389080						0.8176549026567260	1.666810377976090	0.7978235794243660		0.731	1.209	0.518
0.8398754633569150	1.4840175809192000	0.8113619480910700						0.7604399116740870	1.7092572392214600	0.7347546136276740		0.746	1.174	0.558
0.7578217154852570	1.3580597022468600	0.7394512523897640						0.7687351765441280	1.677630786610100	0.7505223246245330		0.779	1.107	0.611
0.7285629330820500	1.3077554512159800	0.711922534327461		0.7738449548504010	1.389174150090280	0.7398142163457510		0.6612872369477780	1.4825510785111200	0.6415188060636930		0.616	1.128	0.478
0.575736006041105	1.101157664973650	0.5604540934828620		0.6523092149029040	1.329035164399010	0.613366153588139		0.6365255792003090	1.5573116862521400	0.6095608375446370		0.59	1.139	0.468
0.5924002157449240	1.2176380816340700	0.5625096915833880		0.5754827415636450	1.239014620024470	0.5373531104418780		0.5830941931652460	1.488737355449830	0.5529966201344770		0.536	1.006	0.462
0.4507606506914270	0.8943069651864820	0.433048421960983		0.4241533494685070	0.8260728762695560	0.4086896928414870		0.376823462531375	0.9116318552309850	0.3559838004060050		0.404	0.892	0.373
0.3809469015270930	0.780098151986086	0.3682275849917200		0.3462686761663290	0.7170855125161620	0.3357462967538980		0.3081266537680050	0.7247166351678290	0.2971179339442490		0.343	0.607	0.33
0.1959237662145310	0.4857237265409480	0.1839869644536360		0.1522560213053900	0.3886780500321260	0.1488475363118620		0.1751962604745150	0.4600739520764590	0.1707002670185710		0.249	0.461	0.241
0.5295076963512100	0.9974850345624990	0.503385797096578		0.4841375572290290	0.961416030735842	0.4592931048019090		0.465538019761007	1.0204605444372200	0.4438783173868510		0.604	0.574	0.601
0.4216765870730160	0.8274534674437150	0.4048745392436140		0.3976817441705530	0.8039248075963280	0.3802644162582160		0.3926543600222950	0.8909694720106930	0.3792750138620230		0.586	0.426	0.591
0.512766610145718	0.9936294221060590	0.4911573351431960		0.4743467664467080	0.9658771026827260	0.450887245957362		0.4392714304819090	1.0113429883592100	0.4193018617266710		0.639	0.653	0.632
0.4601676751644630	0.9351546528772150	0.4402341128830430		0.3831852932600620	0.85015759010786	0.364904698357473		0.4336041878096770	0.9824013401402910	0.4131062649052360		0.501	0.729	0.452
0.3243208956988830	0.8156189507874810	0.303237568421686		0.2741827744677210	0.7666155417587190	0.2559455667172890		0.325642037215907	0.9158759827224910	0.3075858863500940		0.332	0.25	0.381
0.3486487867129940	0.7471013374192660	0.3349383392101200		0.2956963250194360	0.6770958736504060	0.2826650163061170		0.3591470964481270	0.8076798954770770	0.3450736998018020		0.466	0.756	0.449
0.2530429236417570	0.579043522026437	0.2399403354135230		0.2541844801587770	0.570808974100763	0.2470289284347220		0.2804794562440470	0.6411680346513780	0.2683668720198330		0.411	0.768	0.395
0.9585060952316630	1.473919232184760	0.9305275615583900		0.9375232886167630	1.4781411373527800	0.915124748166548		0.934973905209574	1.4764282819460700	0.9231829356861500		0.94	1.517	0.985
1.0335307816050700	1.6152478209135200	1.0278855539650800		0.9820311007157600	1.555085106262440	0.9790939142609090		0.9758511026373380	1.601020945481950	0.985161562361938		0.981	1.611	1.038
0.9988798261833280	1.5222293208632600	0.9826207667267910		0.797142628438887	1.2693414688372600	0.789951744811172		0.8973485737360900	1.4275963784457900	0.8976616253385580		0.901	1.467	0.947
0.8713022664683470	1.3553897696713900	0.873032343008774		0.8896054573887720	1.395234233082740	0.8618259427927480		0.8340567157135490	1.3378774834521400	0.8327044594420070		0.856	1.342	0.891
0.8566091372740430	1.381545605284220	0.837289039763633		0.8361481190617620	1.4126510735289600	0.8135293138664090		0.831233990096985	1.4353283964808000	0.8200744794180770		0.839	1.432	0.862
0.7789139349827380	1.3107353499078700	0.7730009328582640		0.676063158969679	1.207893194064930	0.665454244694815		0.8190500235089500	1.4301638908009200	0.8120598015152720		0.783	1.403	0.809
0.7666461093710280	1.241015655906210	0.7484214747464910		0.7711718933298540	1.2452754769854200	0.7465819438280520		0.7107907750163700	1.245796358057210	0.6961196733311840		0.714	1.115	0.721
0.7097527004864870	1.20111924116884	0.6937352340690390		0.6761740840279690	1.160237211934330	0.6613500319173580		0.7193775027045810	1.316048613410820	0.7027626917153170		0.731	1.168	0.569
0.7387743478781660	1.3149178899333700	0.7186534503270180		0.6568522708717730	1.2249123266078700	0.631659862845617		0.7033298080540100	1.4097791772803200	0.691044011879111		0.72	1.279	0.506
0.7135634566815830	1.164212467404120	0.6888832607831040		0.6950749905846630	1.11668942812926	0.6738041890137380		0.6138391046118990	1.1152492808411100	0.6031821846833970		0.635	1.152	0.643
0.6321794171877940	1.161508334806770	0.6056299879760370		0.507192946688105	1.0044597913421300	0.4805897491217660		0.6272441413531560	1.2728601974980400	0.6111886837561460		0.625	1.276	0.426
0.6415569112763630	1.1609742921517900	0.6198947661511990		0.5644147147779090	1.0452016239526700	0.5396478408743590		0.5822190360628900	1.2072106170718600	0.5640201502525760		0.603	1.123	0.444
0.5204183420246560	0.9508504818066300	0.5014708138812330		0.4937601050064540	0.9210864227911340	0.4768688067790140		0.4595452246784030	0.99122776013196	0.441893948693474		0.46	0.93	0.419
0.4200621418662600	0.964923890398065	0.3931644689119730		0.3376537385365260	0.8678178591026470	0.3138564992318330		0.4177252298361330	1.0771463441384400	0.3972288717707370		0.417	1.037	0.354
0.5055318714450890	1.0379564835267800	0.4853112566295060		0.4318382405490200	0.9464291559690340	0.4091580243472910		0.4243076923793050	1.0928822904963900	0.4048905340112860		0.443	1.003	0.356
0.4925671568267930	1.0277415809440000	0.4673308940954420		0.4278078751980270	0.9501039615039160	0.4002411684136890		0.390370237230032	1.0360575750540900	0.3634346860252100		0.386	0.864	0.446
0.4540939925119140	0.9325323077021020	0.4314501908314090		0.5272323301177640	1.003821879298490	0.5052150141017930		0.4136749354063900	0.9935862099073580	0.3845206627706400		0.65	0.386	0.668
0.5256460523689910	0.9566305373611820	0.5115413597779880		0.3704139262866890	0.7812234411344330	0.3532986909452530		0.3774199424874650	0.8627290401324900	0.3609510485834960
0.4671014016649390	0.9934482387676090	0.4430369553852070		0.3217965833426730	0.8052022967234890	0.3039499360182220		0.3078369920134660	0.8640046704135330	0.2846914294722780
0.444295548205065	0.8958762161359660	0.4187695444658240		0.2804846604392610	0.7345017007474790	0.2641041596675450		0.3035253820794000	0.8712889824769040	0.284559735779251
0.3708399659163610	0.8966803528960680	0.3454550137277580		0.3215882334725980	0.8622417800057080	0.30378810243588		0.2503199703193680	0.8989714731285180	0.2325112767362950
0.435824108506827	0.8534096448902180	0.4182295696273070		0.5001137352309050	0.9218021183478130	0.4803509939954330		0.438938282599685	0.959964776816946	0.420361679507884		0.437	0.732	0.436
0.5419033583956190	0.9510221924464930	0.523867966402204		0.4885423033516340	0.9052762540488210	0.4688072973215290		0.4635671808628520	0.9799388198088310	0.4406006252968830		0.48	0.797	0.48
0.442698850553315	0.8936829396366370	0.4218780458916470		0.4359705795236140	0.8972247658736690	0.4145913162085430		0.4543534189095420	1.0263269564479700	0.4342591936858220		0.467	0.848	0.472
0.4021972641601270	0.7720030820688750	0.391018464320866		0.3711615711943330	0.7537828361578270	0.3566031892029850		0.4405426335269240	0.913973007636946	0.4252100707084210		0.445	0.749	0.519
0.4725128067359410	0.8424952170356570	0.4614602745591640		0.4277507554829170	0.811093381797532	0.4130257100320900		0.4260021256338890	0.908575469747302	0.4131053744495630		0.433	0.741	0.541
0.3942770139101030	0.7348265834210080	0.3836251265142270		0.3107210343701050	0.6963310060079830	0.2962657946552650		0.3872308050058210	0.8621724566611650	0.3726972010031540		0.407	0.714	0.521
0.3337311849764550	0.7839202726698420	0.3121355898707210		0.3850509344725830	0.8416800145878010	0.3649413056734460		0.3661448855930270	0.9161926084149630	0.3474262189929070
0.4395421236971680	0.787453485018976	0.41991028623383		0.3545203517590300	0.7218173053406350	0.3411817276440280		0.3824680004186240	0.8250186303396050	0.3686460012980660		0.432	0.624	0.412
0.3975307528298600	0.7376279843469740	0.3755826666305870		0.3551463642934460	0.7261706901197720	0.3390802462513070		0.3821580679076080	0.853806101806913	0.3634145006173250		0.388	0.648	0.511
0.356278533501257	0.6357488793424910	0.3479121539000130		0.3583469160543830	0.6585310655182730	0.3499661863309620		0.359461830940795	0.7372567547498190	0.3477050832670480
0.4541169655778370	0.7838405481054730	0.4426164337044750		0.4430902557127220	0.7959201323814490	0.4302744395112400		0.3554980529479820	0.7734991131523200	0.3424841441174670		0.402	0.569	0.385
				0.2659238565570650	0.592832437054173	0.2533580825028680		0.3306149964746500	0.716044088240892	0.3146955444348910		0.4	0.528	0.383
				0.3629314332138470	0.6558161858494490	0.3551697126316700		0.3142730815093530	0.6473736130528780	0.3014420666278800		0.372	0.509	0.355
0.910965695358068	1.2472202520219800	0.9372638871934380		0.9332954875754110	1.297039198474640	0.9448816292343850		0.8749586353602690	1.254754172810660	0.9147461549883740		0.875	1.518	0.965
0.8432321843424660	1.1401367619263300	0.9216455370114220		0.9456794682929970	1.2799470995918700	1.0012136501674400		0.9641667219873830	1.3495314837141700	1.0292030258063500		0.939	1.598	0.884
1.0055873786639100	1.3919057409200000	1.034563624360720		0.9419091420261890	1.3250517124967800	0.973808791717082		0.9519468976383910	1.392855839562340	0.9995525562346720		0.9	1.615	0.809
0.8619004876014760	1.3032394248843200	0.8548674353632530		0.8072867119633080	1.2377861384533600	0.798556603322921		0.7269661974956380	1.1982376215305100	0.7265752488102970		0.744	1.225	0.591
0.779748529456364	1.1404563437449900	0.8008168427492100		0.8627464794368950	1.2388893928603300	0.8638630935212960		0.7857414922772440	1.1985664753214200	0.8036620338444930		0.787	1.227	0.685
0.70023028913458	1.0517254681598900	0.709520266022805		0.8206320776187970	1.2373616575939900	0.8329983065768330		0.8345918187039930	1.288448082058290	0.8488934619155290		0.812	1.296	0.707
0.6957952131473840	1.1274084619080900	0.6897696980207760		0.7749679984418490	1.2763631151805000	0.7591946651709790		0.6982629701159280	1.2631445866986500	0.6892466862115450		0.7	1.135	0.588
0.7128869452609480	1.0986344086338100	0.7212196913761770		0.8275988129113060	1.2389573890482300	0.8191675893950820		0.7459387207655680	1.2412569778932900	0.7436992634228550		0.76	1.138	0.707
0.5127546569631790	0.8728883841633030	0.5172301421749260		0.7570172229690370	1.1696585458960300	0.7459978823379510		0.7045314367684090	1.195737710316620	0.702995724765303		0.709	1.096	0.714
0.6580511313365860	1.11524392412995	0.6286531202301130		0.6577941520706680	1.1649538332592500	0.6383303517697170		0.5666404562407630	1.15210892610246	0.5492848589979570		0.555	1.014	0.484
0.6474650675489640	1.0645137071918100	0.6382490418924630		0.552243679783142	0.9547117163552510	0.5415030391903510		0.5572374233000900	1.0648134083868600	0.5449755222699600		0.535	0.866	0.588
0.5068382838915910	0.9603752347650460	0.5001025275215240		0.6270363989956330	1.1245854266156000	0.6049935647229460		0.6026370696323650	1.2228159815151000	0.5886345202443170		0.592	0.977	0.591
0.5686322266247240	1.0768099026132200	0.5426987496255610		0.5570779800013840	1.0914981741971500	0.5254880734440710		0.5210527678798440	1.1851189236941300	0.4949354602691460		0.521	0.985	0.415
0.5083322154409630	0.991416550025538	0.4928048854223340		0.5013562383118540	1.011260189680540	0.475896362008295		0.5210901441152470	1.1657676036722700	0.5016290599964140		0.53	0.955	0.517
0.5056840401976250	1.0211707081974200	0.4896070292407290		0.4180405682215190	0.9470038597122040	0.3919771044457520		0.4585276631980970	1.1062998194798000	0.4353764397131450		0.453	0.896	0.527
